# Supplementary material
Source: PubMed Central journal article supplement (PMC7658419)
Supplement: Supplement_material.pdf [file Supplement_material.pdf]

# Supplemental Materials

## Contents

|                                                                                                   |                                     |
|---------------------------------------------------------------------------------------------------|-------------------------------------|
| Appendix A - Identifying Pregnancies.....                                                         | 3                                   |
| Table S1. Codes Used to Define Pregnancy Outcomes.....                                            | 3                                   |
| Defining Pregnancies using IBM MarketScan Data and Redivis .....                                  | 4                                   |
| Table S2. Pregnancy Cohort Step 1 (n = 4,087,478) .....                                           | 6                                   |
| Table S3. Pregnancy Cohort Step 2 (n = 3,295,900) .....                                           | 6                                   |
| Table S4. Pregnancy Cohort Step 3 (n = 1,703,245) .....                                           | 7                                   |
| Appendix B. Generic Names of Antidepressants.....                                                 | 8                                   |
| Appendix C. Codes to Identify Predefined Health Conditions.....                                   | 9                                   |
| Appendix D. Unweighted and Inverse Probability of Treatment Weighted Standardized Difference .... | 11                                  |
| Table S7. Baseline Demographic and Health Characteristics, Full Cohort, Any Antidepressant .....  | <b>Error! Bookmark not defined.</b> |
| Table S8. Baseline Demographic and Health Characteristics, Full Cohort, Any SSRI.....             | <b>Error! Bookmark not defined.</b> |
| Table S9. Baseline Demographic and Health Characteristics, Full Cohort, Citalopram.....           | <b>Error! Bookmark not defined.</b> |
| Table S10. Baseline Demographic and Health Characteristics, Full Cohort, Escitalopram .....       | <b>Error! Bookmark not defined.</b> |
| Table S11. Baseline Demographic and Health Characteristics, Full Cohort, Fluoxetine.....          | <b>Error! Bookmark not defined.</b> |
| Table S12. Baseline Demographic and Health Characteristics, Full Cohort, Paroxetine .....         | <b>Error! Bookmark not defined.</b> |
| Table S13. Baseline Demographic and Health Characteristics, Full Cohort, Sertraline .....         | <b>Error! Bookmark not defined.</b> |
| Table S14. Baseline Demographic and Health Characteristics, Full Cohort, Any SNRI .....           | <b>Error! Bookmark not defined.</b> |
| Table S15. Baseline Demographic and Health Characteristics, Full Cohort, Duloxetine .....         | <b>Error! Bookmark not defined.</b> |
| Table S16. Baseline Demographic and Health Characteristics, Full Cohort, Desvenlafaxine ..        | <b>Error! Bookmark not defined.</b> |
| Table S17. Baseline Demographic and Health Characteristics, Full Cohort, Venlafaxine.....         | <b>Error! Bookmark not defined.</b> |
| Table S18. Baseline Demographic and Health Characteristics, Full Cohort, Any TCA.....             | <b>Error! Bookmark not defined.</b> |
| Table S19. Baseline Demographic and Health Characteristics, Full Cohort, Amitriptyline.....       | <b>Error! Bookmark not defined.</b> |
| Table S20. Baseline Demographic and Health Characteristics, Full Cohort, Nortriptyline .....      | <b>Error! Bookmark not defined.</b> |

|                                                                                                                                  |                                     |
|----------------------------------------------------------------------------------------------------------------------------------|-------------------------------------|
| Table S21. Baseline Demographic and Health Characteristics, Full Cohort, Any ‘Other’ Antidepressant .....                        | <b>Error! Bookmark not defined.</b> |
| Table S22. Baseline Demographic and Health Characteristics, Full Cohort, Bupropion .....                                         | <b>Error! Bookmark not defined.</b> |
| Table S23. Baseline Demographic and Health Characteristics, Full Cohort, Trazodone .....                                         | <b>Error! Bookmark not defined.</b> |
| Table S24. Baseline Demographic and Health Characteristics, Pre-Pregnancy Depression Cohort, Any Antidepressant .....            | 21                                  |
| Table S25. Baseline Demographic and Health Characteristics, Pre-Pregnancy Depression Cohort, Any SSRI .....                      | 13                                  |
| Table S26. Baseline Demographic and Health Characteristics, Pre-Pregnancy Depression Cohort, Any SNRI .....                      | 15                                  |
| Table S27. Baseline Demographic and Health Characteristics, Pre-Pregnancy Depression Cohort, Any TCA .....                       | 17                                  |
| Table S28. Baseline Demographic and Health Characteristics, Pre-Pregnancy Depression Cohort, Any ‘Other’ Antidepressant .....    | 19                                  |
| Table S29. Baseline Demographic and Health Characteristics, No Pre-Pregnancy Depression Cohort, Any Antidepressant .....         | 23                                  |
| Table S30. Baseline Demographic and Health Characteristics, No Pre-Pregnancy Depression Cohort, Any SSRI .....                   | 25                                  |
| Table S31. Baseline Demographic and Health Characteristics, No Pre-Pregnancy Depression Cohort, Any SNRI .....                   | 27                                  |
| Table S32. Baseline Demographic and Health Characteristics, No Pre-Pregnancy Depression Cohort, Any TCA .....                    | 29                                  |
| Table S33. Baseline Demographic and Health Characteristics, No Pre-Pregnancy Depression Cohort, Any ‘Other’ Antidepressant ..... | 31                                  |

## Supplement A - Identifying Pregnancies

**eTable 1. Codes Used to Define Pregnancy Outcomes**

| Pregnancy Outcome                                                                                     | Code Type       | Code                                                                                                                                                                                                                                                                                                                                                                                                         |
|-------------------------------------------------------------------------------------------------------|-----------------|--------------------------------------------------------------------------------------------------------------------------------------------------------------------------------------------------------------------------------------------------------------------------------------------------------------------------------------------------------------------------------------------------------------|
| Live Birth (1)                                                                                        | ICD-9 Diagnosis | 644.21, 645.11, 645.21, 649.81, 649.82, 650, 651.01, 651.11, 651.21, 651.31, 651.41, 651.51, 669.70, 669.71, 765.0, 765.10-765.29, 766.21, 766.22, V270, V27.2, V27.3, V27.5, V27.6, V30.0, V30.00, V30.01, V31.0, V31.00, V31.01, V32.0, V32.00, V32.01, V33, V33.0, V33.00, V33.01, V34.0, V34.00, V34.01, V35.0, V35.00, V35.01, V36.0, V36.00, V36.01, V37, V37.0, V37.00, V37.01, V39.0, V39.00, V39.01 |
|                                                                                                       | CPT             | 59612, 59614, 59620                                                                                                                                                                                                                                                                                                                                                                                          |
|                                                                                                       | ICD-9 Procedure | 72.0, 72.1, 72.2, 72.21, 72.29, 72.3, 72.31, 72.39, 72.4, 72.5, 72.51, 72.52, 72.53, 72.54, 72.6, 72.7, 72.71, 72.79, 72.8, 72.9, 73.0, 73.01, 73.09, 73.1, 73.2, 73.22, 73.3, 73.4, 73.5, 73.51, 73.59, 73.6, 73.8, 73.9, 73.91, 73.92, 73.93, 73.94, 73.99, 74, 74.0, 74.1, 74.2, 74.4, 74.9, 74.99,                                                                                                       |
|                                                                                                       | DRG             | 790, 791, 792, 793, 795, 765, 766, 767, 768, 774, 775                                                                                                                                                                                                                                                                                                                                                        |
| Stillbirth (1)                                                                                        | ICD-9 Diagnosis | 656.4x, V27.1, V27.4, V27.7                                                                                                                                                                                                                                                                                                                                                                                  |
| Ectopic Pregnancy (2)                                                                                 | ICD-9 Diagnosis | 633, 633.0x, 633.1x, 633.2x, 633.8x, 633.9x                                                                                                                                                                                                                                                                                                                                                                  |
|                                                                                                       | CPT             | 59120, 59121, 59130, 59135, 59136, 59140, 59150, 59151                                                                                                                                                                                                                                                                                                                                                       |
|                                                                                                       | ICD-9 Procedure | 66.0x, 66.62, 74.3                                                                                                                                                                                                                                                                                                                                                                                           |
|                                                                                                       | NDC             | All NDC from MarketScan Redbook that had the generic drug name <i>Methotrexate</i> <sup>a</sup>                                                                                                                                                                                                                                                                                                              |
|                                                                                                       | HCPCS           | J9250, J9260 (Methotrexate Injections)(3)                                                                                                                                                                                                                                                                                                                                                                    |
| Spontaneous Abortion (1)                                                                              | ICD-9 Diagnosis | 631.x, 632.x, 634.x                                                                                                                                                                                                                                                                                                                                                                                          |
|                                                                                                       | CPT             | 59820, 59812, 59830, 59821                                                                                                                                                                                                                                                                                                                                                                                   |
|                                                                                                       | ICD-9 Procedure | 69.51                                                                                                                                                                                                                                                                                                                                                                                                        |
| Induced Abortion (1)                                                                                  | ICD-9 Diagnosis | 635.x, 636.x, 637.x                                                                                                                                                                                                                                                                                                                                                                                          |
|                                                                                                       | CPT             | 59840, 59841, 59850, 59851, 59852, 59855, 59856, 59857                                                                                                                                                                                                                                                                                                                                                       |
|                                                                                                       | HCPCS           | S0199, S2260, S2265, S2262, S2266, S2267                                                                                                                                                                                                                                                                                                                                                                     |
|                                                                                                       | ICD-9 Procedure | 69.01, 74.91, 75.0                                                                                                                                                                                                                                                                                                                                                                                           |
| Abortion (Unknown Type) (1) (NOTE: we combined the few unknown type abortions with induced abortions) | ICD-9 Procedure | 69.52                                                                                                                                                                                                                                                                                                                                                                                                        |
|                                                                                                       | DRG             | 770, 779                                                                                                                                                                                                                                                                                                                                                                                                     |

Abbreviations: ICD = International Classification of Diseases, CPT = Current PRedural Terminology, DRG = Diagnostic Related Groups, HCPCS = Healthcare Common Procedure Coding System, NDC = National Drug Codes

<sup>a</sup> 319 unique NDCs – contact author for complete list of NDC included

## Defining Pregnancies using IBM MarketScan Data and Redivis

There are several approaches to defining pregnancies using claims data,(1,4–6) as well as specific approaches for identifying ectopic pregnancies using claims data.(2) I will primarily use the Ailes et al. (2016) approach, however, will use the Scholes et al. (2011) approach to identify ectopic pregnancies, since they validated their algorithm.(1,2) To implement this approach, I first identify all births based on the Ailes approach, then use the Scholes approach to remove any ectopic pregnancies that could be false positives.

### A. Identify all births

- 1) Import all pregnancy-related codes from Redivis to SAS (NOTE: Redivis is the web platform used by the Center for Population Health Sciences at Stanford to host and share data). This includes data from all inpatient and outpatient services between 2007-2015 (ICD-9 diagnoses (1-4), ICD-9 Procedures, CPT, HCPCS codes from MarketScan Outpatient Services; ICD-9 diagnoses (1-4), ICD-9 Procedures, CPT codes, HCPCS codes, DRG codes from MarketScan Inpatient Services; NDC codes from MarketScan Outpatient Pharmaceutical Claims)
- 2) Only keep codes listed in Table A1 that occurred between November 1, 2008 and September 30, 2015
  - i. The data is available starting Jan 1, 2007, however, I need information in the year before the LMP. The LMP is up to 43 weeks before the pregnancy-end code, so women whose pregnancies ended on November 1, 2008 could all have the maximum 43 weeks of gestation and a full year before LMP of information.
  - ii. September 30, 2015 was selected as the end date because ICD-10-CM goes into effect on October 1, 2015. Wanted to keep codes consistent throughout.

### B. Define Pregnancies

- 1) For each woman on each date, identify the types of pregnancy codes, and group all types of code (ICD-9 Diagnosis, DRG, HCPCS, CPT, ICD-9 Procedure) relating to each pregnancy outcome into separate datasets. For example, we would have all pregnancy codes related to live births in one dataset, all codes related to stillbirth in another, etc.
- 2) Use the Ailes method to identify the gestational age associated with each pregnancy code for each outcome
- 3) If more than one gestational age is identified for an outcome ending on the same date, select the lowest gestational age.(1)

We now have one gestational age assigned to each pregnancy outcome on a specific date for each woman.

Pregnancies of the same type could be too close together to be possible, so we remove duplicates within pregnancy type.

- 4) To remove duplicate pregnancies, we designate earliest code within each pregnancy outcome as the index event, and disregard all subsequent codes for that pregnancy outcome within a predetermined period.
  - a. For Live Births, Stillbirths, Spontaneous Abortions, and Induced Abortions, we require at least 2 months between the end of one pregnancy and the beginning of the next.(1) For example, among live births, for each woman, we identify the first live birth as the index event; we then remove any subsequent pregnancies where the LMP was less than 2 months after the end of that first pregnancy. After those have been deleted, we go to the second pregnancy, and delete any subsequent pregnancies where the LMP was less than 2 months after the end of the second pregnancy. This continues until all 'duplicate' pregnancies have been removed for all pregnancy outcomes.
  - b. For ectopic pregnancies, any codes after the first ectopic pregnancy-related code within 180 days is considered part of the same ectopic pregnancy episode.
- 5) Identify ectopic pregnancies based on Scholes approach.
  - a. Identify the first ectopic pregnancy code, and only kept codes that occurred within 180 days.
  - b. Follow Scholes et al. (2011) algorithm for identifying true ectopic pregnancy episodes and determine treatment type
    - Case 1: 2 or more visits with ectopic pregnancy diagnosis or Procedure codes in an episode
    - Case 2: If only one diagnosis or Procedure code, have and ICD-9 Tubal pregnancy code (633.10, 633.11) in an episode.
    - Case 3: If only one diagnosis or Procedure code, but the code is not a diagnosis of tubal pregnancy (633.10, 633.11), has a methotrexate treatment in the episode

For each woman, we now have no more than one pregnancy of each pregnancy type. Want to identify the first pregnancy for each woman, so eliminate pregnancies that overlap with other pregnancy types. For example, a woman could have an induced abortion code and a stillbirth code the next week – stillbirth codes are more reliable, so we would remove the induced abortion code.

- 6) To remove duplicates across pregnancy type, we use the following hierarchy: Live Birth, Stillbirth, ectopic pregnancy, induced abortion, spontaneous abortion.(4,7)
  - i. Identify all live births and disregard any (stillbirth, ectopic, induced abortion, spontaneous abortion) pregnancies that ended less than 2 months before the LMP of each live birth, and any (stillbirth, ectopic,

induced abortion, spontaneous abortion) pregnancies with LMPs less than 2 months after each live birth occurred.

- ii. Identify all stillbirths and disregard any (ectopic, induced abortion, spontaneous abortion) pregnancies that ended less than 2 months before the LMP of each stillbirth, and any (ectopic, induced abortion, spontaneous abortion) pregnancies with LMPs less than 2 months after each stillbirth occurred.
- iii. Identify all ectopic pregnancies and disregard any (induced abortion, spontaneous abortion) pregnancies that ended less than 2 months before the LMP of each ectopic pregnancy ended, and any (induced abortion, spontaneous abortion) pregnancies with LMPs less than 2 months after each ectopic pregnancy ended.
- iv. Identify all induced abortion pregnancies and disregard any spontaneous abortions that ended less than 2 months before the LMP of each induced abortion occurred, and any spontaneous abortions with LMPs less than 2 months after each induced abortion occurred.

This is our final cohort of pregnancies:

**eTable 2. Pregnancy Cohort Step 1 (n = 4,087,478)**

| <b>Pregnancy Type</b>       | <b>Frequency</b> | <b>Percent</b> |
|-----------------------------|------------------|----------------|
| <b>Live Birth</b>           | 3,250,432        | 79.52          |
| <b>Stillbirth</b>           | 17,860           | 0.44           |
| <b>Ectopic</b>              | 62,979           | 1.54           |
| <b>Induced Abortion</b>     | 271,909          | 6.65           |
| <b>Spontaneous Abortion</b> | 484,298          | 11.85          |

- C. Identify exclusions based on pharmaceutical coverage and enrollment

Remove any pregnancies where the woman did not have prescription drug coverage in the year her pregnancy ended

**eTable 3. Pregnancy Cohort Step 2 (n = 3,295,900)**

| <b>Pregnancy Type</b>       | <b>Frequency</b> | <b>Percent</b> |
|-----------------------------|------------------|----------------|
| <b>Live Birth</b>           | 2,624,835        | 79.64          |
| <b>Stillbirth</b>           | 14,355           | 0.44           |
| <b>Ectopic</b>              | 50,638           | 1.54           |
| <b>Induced Abortion</b>     | 214,078          | 6.50           |
| <b>Spontaneous Abortion</b> | 391,994          | 11.89          |

- D. Remove any pregnancies where the woman did not have sufficient coverage.

- 7) Sufficient coverage is defined as having complete coverage from one year before LMP to one months after LMP. Identify the month/year that the is one month after LMP (coverage end month), identify the month/year one year before LMP (coverage start month)

- i. In the Annual Enrollment Summary, there is an indicator for each month of coverage. Transpose to 'long' form, and keep all months that had enrollment.
- ii. Keep all months that were on or after the start month and on or before the end month
- iii. Count up the number of months kept for each pregnancy, keep pregnancies with at least 13 months of coverage.

**eTable 4. Pregnancy Cohort Step 3 (n = 1,703,245)**

| <b>Pregnancy Type</b>       | <b>Frequency</b> | <b>Percent</b> |
|-----------------------------|------------------|----------------|
| <b>Live Birth</b>           | 1,289,010        | 75.68          |
| <b>Stillbirth</b>           | 7,885            | 0.46           |
| <b>Ectopic</b>              | 30,533           | 1.79           |
| <b>Induced Abortion</b>     | 135,757          | 7.97           |
| <b>Spontaneous Abortion</b> | 240,060          | 14.09          |

## Supplement B. Generic Names of Antidepressants

**eTable 5.** Antidepressants by Antidepressant Class

| <b>Antidepressant Class</b>                  | <b>Generic Name</b>                                                                                                                                                                                                                                                                                                                                                                                      |
|----------------------------------------------|----------------------------------------------------------------------------------------------------------------------------------------------------------------------------------------------------------------------------------------------------------------------------------------------------------------------------------------------------------------------------------------------------------|
| Selective Serotonin Reuptake Inhibitors      | citalopram, escitalopram, fluoxetine, fluvoxamine, paroxetine, sertraline                                                                                                                                                                                                                                                                                                                                |
| Serotonin-Norepinephrine Reuptake Inhibitors | duloxetine, desvenlafaxine, levomilnacipran, venlafaxine                                                                                                                                                                                                                                                                                                                                                 |
| Tricyclic Antidepressants                    | amitriptyline, amoxapine, clomipramine, desipramine, doxepine, imipramine, nortriptyline, protriptyline, trimipramine                                                                                                                                                                                                                                                                                    |
| Other                                        | bupropion (miscellaneous), mirtazapine (tetracyclic antidepressant), maprotiline (tetracyclic antidepressant), nefazodone (phenylpiperazine antidepressant), selegiline (monoamine oxidase inhibitors), trazodone (phenylpiperazine antidepressant), phenelzine (monoamine oxidase inhibitors), tranylcypromine (monoamine oxidase inhibitors), vilazodone (miscellaneous), vortioxetine (miscellaneous) |



## Supplement C. Codes to Identify Predefined Health Conditions

**eTable 6.** Codes to Identify Predefined Health Conditions in the Year before a Woman’s Last Menstrual Period

| Condition                           | Code Type       | Codes                                                                                                    |
|-------------------------------------|-----------------|----------------------------------------------------------------------------------------------------------|
| Sexually Transmitted Infection(8)   | ICD-9 Diagnosis | 090-098, 079.4, 0541, 042, V08, 795.71                                                                   |
| Assisted Reproductive Technology(9) | CPT             | 58970, 58974, 58976                                                                                      |
| Pelvic Inflammatory Disease(10)     | ICD-9 Diagnosis | 098.19, 098.16, 098.10, 098.17, 098.86, 614.9, 099.56, 614.0, 614.2, 615.0, 615.9, 614.3, 614.5, 615.8), |
| Intrauterine Device(11)             | ICD-9 Diagnosis | V25.1, V25.42, 996.65, 996.76                                                                            |
|                                     | CPT             | 58300, 58301                                                                                             |
|                                     | HCPCS           | J7300, J7302                                                                                             |
|                                     | ICD-9 Procedure | 69.7, 97.71                                                                                              |
| Smoking(12)                         | ICD-9 Diagnosis | 305.1, 649.0, 649.00, 649.01, 649.02, 649.03, 649.04, V15.82, 989.84                                     |
|                                     | CPT             | 99406, 99407, G0436, G0437, 9016, 1034F, 4001F, 4004F, G9276, G9458, S4995, S9453                        |

### References

1. Ailes EC, Simeone RM, Dawson AL, Petersen EE, Gilboa SM. Using insurance claims data to identify and estimate critical periods in pregnancy: An application to antidepressants. *Birth Defects Res Part A - Clin Mol Teratol.* 2016;106(11):927–34.
2. Scholes D, Yu O, Raebel MA, Trabert B, Holt VL. Improving automated case finding for ectopic pregnancy using a classification algorithm. *Hum Reprod.* 2011;26(11):3163–8.
3. Hoover K, Tao G, Kent C. Trends in the Diagnosis and Treatment of Ectopic Pregnancy in the United States. *Obstet Gynecol [Internet].* 2010;115(3):495–502. Available from: <http://content.wkhealth.com/linkback/openurl?sid=WKPTLP:landingpage&an=00006250-201003000-00005>
4. Matcho A, Ryan P, Fife D, Gifkins D, Knoll C, Friedman A. Inferring pregnancy episodes and outcomes within a network of observational databases. *PLoS One.* 2018;13(2):1–20.
5. MacDonald SC, Cohen JM, Panchaud A, McElrath TF, Huybrechts KF, Hernández-Díaz S. Identifying pregnancies in insurance claims data: Methods and application to retinoid teratogenic surveillance. *Pharmacoepidemiol Drug Saf.* 2019;28(9):1211–21.
6. Hornbrook MC, Dietz PM, Williams SB, Gold R, Bruce FC, Whitlock EP, et al. Development of an Algorithm to Identify Pregnancy Episodes in an Integrated Health Care Delivery System. *Health Serv Res.* 2006;42(2):908–27.
7. Devine S, West S, Andrews E, Tennis P, Hammad TA, Eaton S, et al. The identification of pregnancies within the general practice research database. *Pharmacoepidemiol Drug Saf.* 2010;19:45–50.
8. For the Record. Coding for STDs. *Rec [Internet].* 2012;24(12):27. Available from:

<https://www.fortherecordmag.com/archives/061812p27.shtml>

9. Martin AS, Monsour M, Kissin DM, Jamieson DJ, Callaghan WM, Boulet SL. Trends in severe maternal morbidity after assisted reproductive technology in the United States, 2008-2012. *Obstet Gynecol.* 2016;127(1):59–66.
10. Military Health Systems. AFHSC Surveillance Case Definitions - Pelvic Inflammatory Disease; Acute [Internet]. 2015. Available from: <https://www.health.mil/Reference-Center/Publications/2015/06/01/Pelvic-Inflammatory-Disease>
11. Webb L. Capturing all necessary codes for IUD insertion and removal can be challenging [Internet]. *JustCoding News: Outpatient.* 2009 [cited 2019 Apr 30]. Available from: <http://www.hcpro.com/HIM-240086-8160/Capturing-all-necessary-codes-for-IUD-insertion-and-removal-can-be-challenging.html>
12. Prabhu M, Garry EM, Hernandez-Diaz S, MacDonald SC, Huybrechts KF, Bateman BT. Frequency of opioid dispensing after vaginal delivery. *Obstet Gynecol.* 2018;132(2):459–65.

## Supplement D. Unweighted and Inverse Probability of Treatment Weighted Standardized Difference

**eTable 7. Baseline Demographic and Health Characteristics, Pre-Pregnancy Depression Cohort, Any Antidepressant**

| Characteristics at the End of Pregnancy                                      |                                  | Had an Antidepressant Prescription | Did not have an Antidepressant Prescription | Unweighted Standardized Differences | IPT Weighted Standardized Differences |      |
|------------------------------------------------------------------------------|----------------------------------|------------------------------------|---------------------------------------------|-------------------------------------|---------------------------------------|------|
|                                                                              |                                  | n (%)                              | n (%)                                       |                                     |                                       |      |
| Age                                                                          |                                  |                                    |                                             |                                     |                                       |      |
|                                                                              | 15-19                            | 2197 (5.45)                        | 6332 (9.52)                                 | 0.16                                | 0.00                                  |      |
|                                                                              | 20-24                            | 4569 (11.34)                       | 10176 (15.3)                                | 0.12                                | 0.00                                  |      |
|                                                                              | 25-29                            | 8944 (22.2)                        | 14966 (22.5)                                | 0.01                                | 0.00                                  |      |
|                                                                              | 30-34                            | 13099 (32.51)                      | 19540 (29.38)                               | 0.07                                | 0.00                                  |      |
|                                                                              | 35-39                            | 8774 (21.78)                       | 12069 (18.15)                               | 0.09                                | 0.00                                  |      |
|                                                                              | 40-44                            | 2704 (6.71)                        | 3418 (5.14)                                 | 0.07                                | 0.00                                  |      |
| Year                                                                         |                                  |                                    |                                             |                                     |                                       |      |
|                                                                              | 2008 -2011                       | 17452 (43.32)                      | 29009 (43.62)                               | 0.01                                | 0.00                                  |      |
|                                                                              | 2012-2015                        | 22835 (56.68)                      | 37492 (56.38)                               | 0.01                                | 0.00                                  |      |
| <b>Medical Conditions in the year before a woman's last menstrual period</b> |                                  |                                    |                                             |                                     |                                       |      |
|                                                                              | Sexually Transmitted Infection   | 768 (1.91)                         | 1523 (2.29)                                 | 0.03                                | 0.00                                  |      |
|                                                                              | Assisted Reproductive Technology | 268 (0.67)                         | 478 (0.72)                                  | 0.01                                | 0.00                                  |      |
|                                                                              | Pelvic Infection                 | 373 (0.93)                         | 751 (1.13)                                  | 0.02                                | 0.00                                  |      |
|                                                                              | Intrauterine Device              | 2060 (5.11)                        | 3401 (5.11)                                 | 0.00                                | 0.00                                  |      |
|                                                                              | Smoking                          | 2884 (7.16)                        | 4953 (7.45)                                 | 0.01                                | 0.00                                  |      |
| <b>Health in the year before a woman's last menstrual period</b>             |                                  |                                    |                                             |                                     |                                       |      |
| Data Dimension                                                               | Code*                            | Recurrence**                       |                                             |                                     |                                       |      |
| DX                                                                           | 300                              | Once                               | 15684 (38.93)                               | 19417 (29.2)                        | 0.21                                  | 0.00 |
| DX                                                                           | 300                              | Sporadic                           | 9836 (24.41)                                | 10823 (16.27)                       | 0.20                                  | 0.00 |
| DX                                                                           | 401                              | Once                               | 2797 (6.94)                                 | 3711 (5.58)                         | 0.06                                  | 0.00 |
| DX                                                                           | 616                              | Once                               | 4531 (11.25)                                | 9055 (13.62)                        | 0.07                                  | 0.00 |
| RX                                                                           | 00093007401                      | Once                               | 1678 (4.17)                                 | 1612 (2.42)                         | 0.10                                  | 0.01 |
| RX                                                                           | 59746000103                      | Once                               | 1554 (3.86)                                 | 1763 (2.65)                         | 0.07                                  | 0.00 |
| RX                                                                           | 00093007401                      | Sporadic                           | 994 (2.47)                                  | 786 (1.18)                          | 0.10                                  | 0.01 |
| DX                                                                           | 780                              | Once                               | 14174 (35.18)                               | 20937 (31.48)                       | 0.08                                  | 0.00 |
| DX                                                                           | 401                              | Sporadic                           | 1705 (4.23)                                 | 2083 (3.13)                         | 0.06                                  | 0.00 |
| RX                                                                           | 00406051201                      | Once                               | 1777 (4.41)                                 | 2430 (3.65)                         | 0.04                                  | 0.00 |
| DX                                                                           | 626                              | Once                               | 9553 (23.71)                                | 17156 (25.8)                        | 0.05                                  | 0.00 |
| DX                                                                           | 327                              | Once                               | 1048 (2.6)                                  | 991 (1.49)                          | 0.08                                  | 0.00 |
| DX                                                                           | 623                              | Once                               | 2388 (5.93)                                 | 4796 (7.21)                         | 0.05                                  | 0.00 |
| DX                                                                           | 346                              | Once                               | 4001 (9.93)                                 | 5403 (8.12)                         | 0.06                                  | 0.00 |
| DX                                                                           | 530                              | Once                               | 3090 (7.67)                                 | 4306 (6.48)                         | 0.05                                  | 0.00 |
| DX                                                                           | 626                              | Frequent                           | 4103 (10.18)                                | 7498 (11.28)                        | 0.04                                  | 0.00 |
| DX                                                                           | 724                              | Sporadic                           | 4377 (10.86)                                | 6485 (9.75)                         | 0.04                                  | 0.00 |
| RX                                                                           | 00378191210                      | Once                               | 380 (0.94)                                  | 299 (0.45)                          | 0.06                                  | 0.01 |
| DX                                                                           | 346                              | Frequent                           | 1220 (3.03)                                 | 1351 (2.03)                         | 0.06                                  | 0.00 |
| RX                                                                           | 00093007401                      | Frequent                           | 515 (1.28)                                  | 360 (0.54)                          | 0.08                                  | 0.01 |
| DX                                                                           | 729                              | Frequent                           | 2516 (6.25)                                 | 3400 (5.11)                         | 0.05                                  | 0.00 |
| RX                                                                           | 00378075110                      | Once                               | 906 (2.25)                                  | 1112 (1.67)                         | 0.04                                  | 0.00 |
| RX                                                                           | 00378191210                      | Sporadic                           | 233 (0.58)                                  | 168 (0.25)                          | 0.05                                  | 0.01 |
| DX                                                                           | 300                              | Frequent                           | 5256 (13.05)                                | 5372 (8.08)                         | 0.16                                  | 0.00 |
| RX                                                                           | 67253090150                      | Frequent                           | 189 (0.47)                                  | 122 (0.18)                          | 0.05                                  | 0.00 |
| RX                                                                           | 00603388728                      | Once                               | 291 (0.72)                                  | 291 (0.44)                          | 0.04                                  | 0.00 |
| RX                                                                           | 00591024005                      | Once                               | 276 (0.69)                                  | 234 (0.35)                          | 0.05                                  | 0.00 |

|    |             |          |              |               |      |      |
|----|-------------|----------|--------------|---------------|------|------|
| DX | V58         | Once     | 3898 (9.68)  | 4958 (7.46)   | 0.08 | 0.00 |
| DX | 789         | Once     | 8917 (22.13) | 15381 (23.13) | 0.02 | 0.00 |
| DX | 625         | Once     | 6020 (14.94) | 10558 (15.88) | 0.03 | 0.00 |
| RX | 63304077205 | Frequent | 203 (0.5)    | 119 (0.18)    | 0.06 | 0.00 |
| DX | 729         | Once     | 5787 (14.36) | 8683 (13.06)  | 0.04 | 0.00 |
| DX | V20         | Once     | 493 (1.22)   | 1153 (1.73)   | 0.04 | 0.00 |
| RX | 00378191010 | Once     | 849 (2.11)   | 649 (0.98)    | 0.09 | 0.01 |
| DX | 780         | Frequent | 6396 (15.88) | 8662 (13.03)  | 0.08 | 0.00 |
| DX | 722         | Once     | 1942 (4.82)  | 2543 (3.82)   | 0.05 | 0.00 |
| RX | 00378400305 | Frequent | 130 (0.32)   | 93 (0.14)     | 0.04 | 0.00 |
| DX | 296         | Once     | 3579 (8.88)  | 4860 (7.31)   | 0.06 | 0.00 |
| DX | 314         | Once     | 2435 (6.04)  | 3434 (5.16)   | 0.04 | 0.00 |
| RX | 00781183001 | Once     | 1409 (3.5)   | 1796 (2.7)    | 0.05 | 0.00 |
| RX | 53746010901 | Once     | 647 (1.61)   | 747 (1.12)    | 0.04 | 0.00 |
| RX | 00378232105 | Once     | 648 (1.61)   | 585 (0.88)    | 0.07 | 0.00 |
| DX | 272         | Frequent | 1210 (3)     | 1465 (2.2)    | 0.05 | 0.00 |
| DX | 724         | Once     | 7412 (18.4)  | 11572 (17.4)  | 0.03 | 0.00 |
| RX | 00093083201 | Once     | 1607 (3.99)  | 1355 (2.04)   | 0.11 | 0.00 |
| DX | 401         | Frequent | 713 (1.77)   | 919 (1.38)    | 0.03 | 0.00 |
| DX | 614         | Frequent | 137 (0.34)   | 313 (0.47)    | 0.02 | 0.00 |
| RX | 00781107705 | Once     | 487 (1.21)   | 470 (0.71)    | 0.05 | 0.00 |
| DX | 723         | Once     | 4371 (10.85) | 6214 (9.34)   | 0.05 | 0.00 |
| RX | 59746017710 | Once     | 890 (2.21)   | 1076 (1.62)   | 0.04 | 0.00 |
| RX | 00378400305 | Once     | 428 (1.06)   | 411 (0.62)    | 0.05 | 0.00 |
| DX | 616         | Frequent | 1096 (2.72)  | 2373 (3.57)   | 0.05 | 0.00 |
| DX | 614         | Once     | 544 (1.35)   | 1038 (1.56)   | 0.02 | 0.00 |
| DX | 477         | Frequent | 1772 (4.4)   | 2309 (3.47)   | 0.05 | 0.00 |
| DX | 787         | Once     | 6218 (15.43) | 9632 (14.48)  | 0.03 | 0.00 |
| RX | 00603254421 | Once     | 308 (0.76)   | 335 (0.5)     | 0.03 | 0.00 |
| DX | 628         | Sporadic | 1687 (4.19)  | 2951 (4.44)   | 0.01 | 0.00 |
| DX | 218         | Once     | 677 (1.68)   | 1381 (2.08)   | 0.03 | 0.00 |
| DX | 640         | Once     | 2583 (6.41)  | 4993 (7.51)   | 0.04 | 0.00 |
| DX | 787         | Frequent | 2383 (5.92)  | 3496 (5.26)   | 0.03 | 0.00 |

NOTE: This table presents the top 60 health variables included in the HDPS model – contact the authors for the full list of 500 variables included

NOTE: Cells with fewer than 15 observations are suppressed to maintain confidentiality

Abbreviations: DX = diagnosis, PR = Procedure, RX = pharmaceutical

\* ICD-9 diagnosis codes Inpatient and Outpatient DX codes, ICD-9 Procedure codes for Inpatient and outpatient PR codes, NDC codes for Outpatient RX codes

\*\*Once – if the code appeared at least once within one year; sporadic – if code appeared at least more than the median; frequent – if the code appeared more than the 75<sup>th</sup> percentile

**eTable 8. Baseline Demographic and Health Characteristics, Pre-Pregnancy Depression Cohort, Any SSRI**

| Characteristics at the End of Pregnancy                                      |                                  |              | Had an SSRI Prescription | Did not have an SSRI Prescription | Unweighted Standardized Differences | IPT Weighted Standardized Differences |
|------------------------------------------------------------------------------|----------------------------------|--------------|--------------------------|-----------------------------------|-------------------------------------|---------------------------------------|
|                                                                              |                                  |              | n (%)                    | n (%)                             |                                     |                                       |
| Age                                                                          |                                  |              |                          |                                   |                                     |                                       |
|                                                                              | 15-19                            |              | 1765 (6.21)              | 6764 (8.63)                       | 0.09                                | 0.00                                  |
|                                                                              | 20-24                            |              | 3260 (11.47)             | 11485 (14.66)                     | 0.09                                | 0.00                                  |
|                                                                              | 25-29                            |              | 6442 (22.66)             | 17468 (22.29)                     | 0.01                                | 0.00                                  |
|                                                                              | 30-34                            |              | 9157 (32.2)              | 23482 (29.97)                     | 0.05                                | 0.00                                  |
|                                                                              | 35-39                            |              | 6036 (21.23)             | 14807 (18.9)                      | 0.06                                | 0.00                                  |
|                                                                              | 40-44                            |              | 1774 (6.24)              | 4348 (5.55)                       | 0.03                                | 0.00                                  |
| Year                                                                         |                                  |              |                          |                                   |                                     |                                       |
|                                                                              | 2008 -2011                       |              | 12134 (42.67)            | 34327 (43.81)                     | 0.02                                | 0.00                                  |
|                                                                              | 2012-2015                        |              | 16300 (57.33)            | 44027 (56.19)                     | 0.02                                | 0.00                                  |
| <b>Medical Conditions in the year before a woman's last menstrual period</b> |                                  |              |                          |                                   |                                     |                                       |
|                                                                              | Sexually Transmitted Infection   |              | 531 (1.87)               | 1760 (2.25)                       | 0.03                                | 0.00                                  |
|                                                                              | Assisted Reproductive Technology |              | 208 (0.73)               | 538 (0.69)                        | 0.01                                | 0.00                                  |
|                                                                              | Pelvic Infection                 |              | 259 (0.91)               | 865 (1.1)                         | 0.02                                | 0.00                                  |
|                                                                              | Intrauterine Device              |              | 1407 (4.95)              | 4054 (5.17)                       | 0.01                                | 0.00                                  |
|                                                                              | Smoking                          |              | 1953 (6.87)              | 5884 (7.51)                       | 0.02                                | 0.00                                  |
| <b>Health in the year before a woman's last menstrual period</b>             |                                  |              |                          |                                   |                                     |                                       |
| Data Dimension                                                               | Code*                            | Recurrence** |                          |                                   |                                     |                                       |
| DX                                                                           | 300                              | Once         | 11331 (39.85)            | 23770 (30.34)                     | 0.20                                | 0.00                                  |
| DX                                                                           | 300                              | Sporadic     | 7118 (25.03)             | 13541 (17.28)                     | 0.19                                | 0.01                                  |
| DX                                                                           | 616                              | Once         | 3118 (10.97)             | 10468 (13.36)                     | 0.07                                | 0.00                                  |
| DX                                                                           | 623                              | Once         | 1664 (5.85)              | 5520 (7.04)                       | 0.05                                | 0.00                                  |
| DX                                                                           | 789                              | Once         | 6218 (21.87)             | 18080 (23.07)                     | 0.03                                | 0.00                                  |
| DX                                                                           | V26                              | Once         | 2158 (7.59)              | 5399 (6.89)                       | 0.03                                | 0.00                                  |
| DX                                                                           | 626                              | Once         | 6753 (23.75)             | 19956 (25.47)                     | 0.04                                | 0.00                                  |
| DX                                                                           | 625                              | Once         | 4193 (14.75)             | 12385 (15.81)                     | 0.03                                | 0.00                                  |
| RX                                                                           | 59746000103                      | Once         | 1027 (3.61)              | 2290 (2.92)                       | 0.04                                | 0.00                                  |
| RX                                                                           | 00093007401                      | Once         | 1065 (3.75)              | 2225 (2.84)                       | 0.05                                | 0.00                                  |
| RX                                                                           | 00093007401                      | Sporadic     | 626 (2.2)                | 1154 (1.47)                       | 0.05                                | 0.00                                  |
| RX                                                                           | 00406051201                      | Once         | 1223 (4.3)               | 2984 (3.81)                       | 0.02                                | 0.00                                  |
| DX                                                                           | 626                              | Frequent     | 2905 (10.22)             | 8696 (11.1)                       | 0.03                                | 0.00                                  |
| DX                                                                           | 300                              | Frequent     | 3813 (13.41)             | 6815 (8.7)                        | 0.15                                | 0.00                                  |
| DX                                                                           | 629                              | Once         | 551 (1.94)               | 1285 (1.64)                       | 0.02                                | 0.00                                  |
| RX                                                                           | 63304077205                      | Frequent     | 155 (0.55)               | 167 (0.21)                        | 0.05                                | 0.00                                  |
| DX                                                                           | 401                              | Once         | 1841 (6.47)              | 4667 (5.96)                       | 0.02                                | 0.00                                  |
| RX                                                                           | 00591024005                      | Once         | 195 (0.69)               | 315 (0.4)                         | 0.04                                | 0.00                                  |
| DX                                                                           | 530                              | Once         | 2135 (7.51)              | 5261 (6.71)                       | 0.03                                | 0.00                                  |
| RX                                                                           | 67253090150                      | Frequent     | 131 (0.46)               | 180 (0.23)                        | 0.04                                | 0.00                                  |
| RX                                                                           | 00378191010                      | Once         | 611 (2.15)               | 887 (1.13)                        | 0.08                                | 0.00                                  |
| RX                                                                           | 00378232105                      | Once         | 487 (1.71)               | 746 (0.95)                        | 0.07                                | 0.00                                  |
| DX                                                                           | 599                              | Once         | 4339 (15.26)             | 13467 (17.19)                     | 0.05                                | 0.00                                  |
| DX                                                                           | 327                              | Once         | 677 (2.38)               | 1362 (1.74)                       | 0.05                                | 0.00                                  |
| DX                                                                           | 401                              | Sporadic     | 1118 (3.93)              | 2670 (3.41)                       | 0.03                                | 0.00                                  |
| DX                                                                           | 216                              | Once         | 2299 (8.09)              | 5373 (6.86)                       | 0.05                                | 0.00                                  |
| DX                                                                           | 780                              | Once         | 9702 (34.12)             | 25409 (32.43)                     | 0.04                                | 0.01                                  |
| DX                                                                           | 614                              | Frequent     | 93 (0.33)                | 357 (0.46)                        | 0.02                                | 0.00                                  |
| DX                                                                           | 629                              | Frequent     | 163 (0.57)               | 344 (0.44)                        | 0.02                                | 0.00                                  |
| RX                                                                           | 49884070155                      | Once         | 424 (1.49)               | 1023 (1.31)                       | 0.02                                | 0.00                                  |
| DX                                                                           | V26                              | Frequent     | 552 (1.94)               | 1362 (1.74)                       | 0.02                                | 0.00                                  |

|    |             |          |              |               |      |      |
|----|-------------|----------|--------------|---------------|------|------|
| DX | 625         | Frequent | 1589 (5.59)  | 4806 (6.13)   | 0.02 | 0.00 |
| DX | 616         | Frequent | 764 (2.69)   | 2705 (3.45)   | 0.04 | 0.00 |
| RX | 00378400305 | Frequent | 86 (0.3)     | 137 (0.17)    | 0.03 | 0.00 |
| RX | 00093007401 | Frequent | 323 (1.14)   | 552 (0.7)     | 0.05 | 0.00 |
| RX | 00781107705 | Once     | 336 (1.18)   | 621 (0.79)    | 0.04 | 0.00 |
| RX | 00093083201 | Once     | 1092 (3.84)  | 1870 (2.39)   | 0.08 | 0.00 |
| DX | 620         | Once     | 1946 (6.84)  | 5677 (7.25)   | 0.02 | 0.00 |
| RX | 59310057922 | Once     | 530 (1.86)   | 1118 (1.43)   | 0.03 | 0.00 |
| RX | 67253090150 | Once     | 426 (1.5)    | 625 (0.8)     | 0.07 | 0.00 |
| RX | 00378400305 | Once     | 294 (1.03)   | 545 (0.7)     | 0.04 | 0.00 |
| DX | V74         | Once     | 2512 (8.83)  | 7997 (10.21)  | 0.05 | 0.00 |
| RX | 53746010901 | Once     | 439 (1.54)   | 955 (1.22)    | 0.03 | 0.00 |
| RX | 00378075110 | Once     | 599 (2.11)   | 1419 (1.81)   | 0.02 | 0.00 |
| PR | 196         | Once     | 1625 (5.71)  | 3998 (5.1)    | 0.03 | 0.00 |
| DX | 041         | Once     | 371 (1.3)    | 1272 (1.62)   | 0.03 | 0.00 |
| RX | 00555032302 | Frequent | 60 (0.21)    | 93 (0.12)     | 0.02 | 0.00 |
| RX | 00378191010 | Frequent | 211 (0.74)   | 260 (0.33)    | 0.06 | 0.00 |
| DX | 272         | Frequent | 823 (2.89)   | 1852 (2.36)   | 0.03 | 0.00 |
| DX | 614         | Once     | 389 (1.37)   | 1193 (1.52)   | 0.01 | 0.00 |
| DX | 218         | Once     | 488 (1.72)   | 1570 (2)      | 0.02 | 0.00 |
| RX | 00591024005 | Frequent | 63 (0.22)    | 99 (0.13)     | 0.02 | 0.00 |
| DX | 789         | Frequent | 1724 (6.06)  | 4994 (6.37)   | 0.01 | 0.00 |
| RX | 00603388728 | Once     | 183 (0.64)   | 399 (0.51)    | 0.02 | 0.00 |
| RX | 00093007301 | Frequent | 129 (0.45)   | 200 (0.26)    | 0.03 | 0.00 |
| RX | 00781107705 | Frequent | 107 (0.38)   | 156 (0.2)     | 0.03 | 0.00 |
| DX | 477         | Frequent | 1208 (4.25)  | 2873 (3.67)   | 0.03 | 0.00 |
| DX | V72         | Frequent | 4041 (14.21) | 11547 (14.74) | 0.01 | 0.00 |
| RX | 00173069600 | Once     | 319 (1.12)   | 685 (0.87)    | 0.02 | 0.00 |
| RX | 00093714618 | Once     | 2161 (7.6)   | 5086 (6.49)   | 0.04 | 0.00 |

NOTE: This table presents the top 60 health variables included in the HDPS model – contact the authors for the full list of 500 variables included

NOTE: Cells with fewer than 15 observations are suppressed to maintain confidentiality

Abbreviations: DX = diagnosis, PR = Procedure, RX = pharmaceutical

\* ICD-9 diagnosis codes Inpatient and Outpatient DX codes, ICD-9 Procedure codes for Inpatient and outpatient PR codes, NDC codes for Outpatient RX codes

\*\*Once – if the code appeared at least once within one year; sporadic – if code appeared at least more than the median; frequent – if the code appeared more than the 75<sup>th</sup> percentile

**eTable 9. Baseline Demographic and Health Characteristics, Pre-Pregnancy Depression Cohort, Any SNRI**

| Characteristics at the End of Pregnancy                                      |             | Had an SNRI Prescription | Did not have an SNRI Prescription | Unweighted Standardized Differences | IPT Weighted Standardized Differences |      |
|------------------------------------------------------------------------------|-------------|--------------------------|-----------------------------------|-------------------------------------|---------------------------------------|------|
|                                                                              |             | n (%)                    | n (%)                             |                                     |                                       |      |
| <b>Age</b>                                                                   |             |                          |                                   |                                     |                                       |      |
| 15-19                                                                        |             | 196 (2.96)               | 8333 (8.32)                       | 0.23                                | 0.03                                  |      |
| 20-24                                                                        |             | 775 (11.71)              | 13970 (13.95)                     | 0.07                                | 0.00                                  |      |
| 25-29                                                                        |             | 1427 (21.56)             | 22483 (22.45)                     | 0.02                                | 0.01                                  |      |
| 30-34                                                                        |             | 2184 (32.99)             | 30455 (30.4)                      | 0.06                                | 0.01                                  |      |
| 35-39                                                                        |             | 1538 (23.23)             | 19305 (19.27)                     | 0.10                                | 0.00                                  |      |
| 40-44                                                                        |             | 500 (7.55)               | 5622 (5.61)                       | 0.08                                | 0.01                                  |      |
| <b>Year</b>                                                                  |             |                          |                                   |                                     |                                       |      |
| 2008 -2011                                                                   |             | 3107 (46.93)             | 43354 (43.28)                     | 0.07                                | 0.01                                  |      |
| 2012-2015                                                                    |             | 3513 (53.07)             | 56814 (56.72)                     | 0.07                                | 0.01                                  |      |
| <b>Medical Conditions in the year before a woman's last menstrual period</b> |             |                          |                                   |                                     |                                       |      |
| Sexually Transmitted Infection                                               |             | 135 (2.04)               | 2156 (2.15)                       | 0.01                                | 0.01                                  |      |
| Assisted Reproductive Technology                                             |             | 23 (0.35)                | 723 (0.72)                        | 0.05                                | 0.00                                  |      |
| Pelvic Infection                                                             |             | 58 (0.88)                | 1066 (1.06)                       | 0.02                                | 0.00                                  |      |
| Intrauterine Device                                                          |             | 358 (5.41)               | 5103 (5.09)                       | 0.01                                | 0.00                                  |      |
| Smoking                                                                      |             | 530 (8.01)               | 7307 (7.29)                       | 0.03                                | 0.01                                  |      |
| <b>Health in the year before a woman's last menstrual period</b>             |             |                          |                                   |                                     |                                       |      |
| Data Dimension                                                               | Code*       | Recurrence**             |                                   |                                     |                                       |      |
| DX                                                                           | 401         | Once                     | 580 (8.76)                        | 5928 (5.92)                         | 0.11                                  | 0.02 |
| DX                                                                           | 729         | Once                     | 1254 (18.94)                      | 13216 (13.19)                       | 0.16                                  | 0.01 |
| DX                                                                           | 729         | Frequent                 | 635 (9.59)                        | 5281 (5.27)                         | 0.17                                  | 0.01 |
| DX                                                                           | 628         | Once                     | 434 (6.56)                        | 8084 (8.07)                         | 0.06                                  | 0.01 |
| DX                                                                           | 628         | Sporadic                 | 209 (3.16)                        | 4429 (4.42)                         | 0.07                                  | 0.00 |
| DX                                                                           | 724         | Sporadic                 | 874 (13.2)                        | 9988 (9.97)                         | 0.10                                  | 0.01 |
| RX                                                                           | 00093007401 | Once                     | 376 (5.68)                        | 2914 (2.91)                         | 0.14                                  | 0.02 |
| DX                                                                           | 780         | Once                     | 2591 (39.14)                      | 32520 (32.47)                       | 0.14                                  | 0.03 |
| DX                                                                           | 401         | Sporadic                 | 357 (5.39)                        | 3431 (3.43)                         | 0.10                                  | 0.02 |
| DX                                                                           | 724         | Once                     | 1400 (21.15)                      | 17584 (17.55)                       | 0.09                                  | 0.01 |
| DX                                                                           | V26         | Once                     | 371 (5.6)                         | 7186 (7.17)                         | 0.06                                  | 0.00 |
| DX                                                                           | 722         | Once                     | 463 (6.99)                        | 4022 (4.02)                         | 0.13                                  | 0.00 |
| DX                                                                           | 346         | Once                     | 824 (12.45)                       | 8580 (8.57)                         | 0.13                                  | 0.03 |
| RX                                                                           | 59746000103 | Once                     | 305 (4.61)                        | 3012 (3.01)                         | 0.08                                  | 0.02 |
| DX                                                                           | 300         | Once                     | 2724 (41.15)                      | 32377 (32.32)                       | 0.18                                  | 0.04 |
| DX                                                                           | 300         | Sporadic                 | 1763 (26.63)                      | 18896 (18.86)                       | 0.19                                  | 0.04 |
| DX                                                                           | 346         | Frequent                 | 293 (4.43)                        | 2278 (2.27)                         | 0.12                                  | 0.02 |
| RX                                                                           | 00093007401 | Sporadic                 | 214 (3.23)                        | 1566 (1.56)                         | 0.11                                  | 0.03 |
| DX                                                                           | 327         | Once                     | 235 (3.55)                        | 1804 (1.8)                          | 0.11                                  | 0.01 |
| DX                                                                           | 338         | Once                     | 327 (4.94)                        | 3129 (3.12)                         | 0.09                                  | 0.01 |
| RX                                                                           | 00603388728 | Once                     | 73 (1.1)                          | 509 (0.51)                          | 0.07                                  | 0.01 |
| DX                                                                           | 719         | Frequent                 | 373 (5.63)                        | 4079 (4.07)                         | 0.07                                  | 0.01 |
| RX                                                                           | 00406051201 | Once                     | 323 (4.88)                        | 3884 (3.88)                         | 0.05                                  | 0.02 |
| DX                                                                           | 780         | Frequent                 | 1300 (19.64)                      | 13758 (13.73)                       | 0.16                                  | 0.03 |
| DX                                                                           | V20         | Once                     | 38 (0.57)                         | 1608 (1.61)                         | 0.10                                  | 0.00 |
| DX                                                                           | 787         | Once                     | 1139 (17.21)                      | 14711 (14.69)                       | 0.07                                  | 0.01 |
| DX                                                                           | 723         | Once                     | 879 (13.28)                       | 9706 (9.69)                         | 0.11                                  | 0.01 |
| DX                                                                           | V58         | Once                     | 792 (11.96)                       | 8064 (8.05)                         | 0.13                                  | 0.00 |
| DX                                                                           | 401         | Frequent                 | 156 (2.36)                        | 1476 (1.47)                         | 0.06                                  | 0.01 |
| DX                                                                           | V23         | Sporadic                 | 78 (1.18)                         | 1966 (1.96)                         | 0.06                                  | 0.01 |
| RX                                                                           | 00378191210 | Once                     | 88 (1.33)                         | 591 (0.59)                          | 0.08                                  | 0.01 |

|    |             |          |              |               |      |      |
|----|-------------|----------|--------------|---------------|------|------|
| RX | 49884070155 | Once     | 61 (0.92)    | 1386 (1.38)   | 0.04 | 0.01 |
| DX | 530         | Once     | 558 (8.43)   | 6838 (6.83)   | 0.06 | 0.00 |
| DX | V23         | Frequent | 46 (0.69)    | 1250 (1.25)   | 0.06 | 0.02 |
| DX | 786         | Frequent | 529 (7.99)   | 6357 (6.35)   | 0.06 | 0.01 |
| DX | 719         | Once     | 1181 (17.84) | 14560 (14.54) | 0.09 | 0.01 |
| RX | 65162062711 | Frequent | 86 (1.3)     | 470 (0.47)    | 0.09 | 0.01 |
| DX | 784         | Frequent | 527 (7.96)   | 5594 (5.58)   | 0.09 | 0.00 |
| DX | 784         | Once     | 1181 (17.84) | 14836 (14.81) | 0.08 | 0.00 |
| DX | 722         | Frequent | 138 (2.08)   | 1015 (1.01)   | 0.09 | 0.01 |
| RX | 00378191210 | Sporadic | 56 (0.85)    | 345 (0.34)    | 0.07 | 0.01 |
| DX | 278         | Once     | 617 (9.32)   | 7234 (7.22)   | 0.08 | 0.00 |
| DX | 789         | Frequent | 479 (7.24)   | 6239 (6.23)   | 0.04 | 0.00 |
| RX | 00781183001 | Once     | 291 (4.4)    | 2914 (2.91)   | 0.08 | 0.02 |
| DX | V23         | Once     | 154 (2.33)   | 3744 (3.74)   | 0.08 | 0.01 |
| DX | 628         | Frequent | 106 (1.6)    | 2151 (2.15)   | 0.04 | 0.00 |
| DX | 296         | Once     | 685 (10.35)  | 7754 (7.74)   | 0.09 | 0.02 |
| RX | 00378400305 | Frequent | 32 (0.48)    | 191 (0.19)    | 0.05 | 0.01 |
| RX | 00378075110 | Once     | 174 (2.63)   | 1844 (1.84)   | 0.05 | 0.01 |
| DX | 787         | Frequent | 451 (6.81)   | 5428 (5.42)   | 0.06 | 0.00 |
| DX | 786         | Once     | 1401 (21.16) | 18573 (18.54) | 0.07 | 0.01 |
| PR | 196         | Once     | 250 (3.78)   | 5373 (5.36)   | 0.08 | 0.01 |
| DX | 626         | Once     | 1537 (23.22) | 25172 (25.13) | 0.04 | 0.00 |
| DX | 640         | Once     | 336 (5.08)   | 7240 (7.23)   | 0.09 | 0.01 |
| DX | 272         | Frequent | 251 (3.79)   | 2424 (2.42)   | 0.08 | 0.00 |
| DX | 272         | Once     | 639 (9.65)   | 6748 (6.74)   | 0.11 | 0.01 |
| DX | 728         | Once     | 494 (7.46)   | 5494 (5.48)   | 0.08 | 0.01 |
| RX | 59746017710 | Once     | 187 (2.82)   | 1779 (1.78)   | 0.07 | 0.01 |
| DX | 724         | Frequent | 446 (6.74)   | 4873 (4.86)   | 0.08 | 0.01 |
| DX | V26         | Frequent | 94 (1.42)    | 1820 (1.82)   | 0.03 | 0.00 |

NOTE: This table presents the top 60 health variables included in the HDPS model – contact the authors for the full list of 500 variables included

NOTE: Cells with fewer than 15 observations are suppressed to maintain confidentiality

Abbreviations: DX = diagnosis, PR = Procedure, RX = pharmaceutical

\* ICD-9 diagnosis codes Inpatient and Outpatient DX codes, ICD-9 Procedure codes for Inpatient and outpatient PR codes, NDC codes for Outpatient RX codes

\*\*Once – if the code appeared at least once within one year; sporadic – if code appeared at least more than the median; frequent – if the code appeared more than the 75<sup>th</sup> percentile



**eTable 10. Baseline Demographic and Health Characteristics, Pre-Pregnancy Depression Cohort, Any TCA**

| Characteristics at the End of Pregnancy                                      |                                  |              | Had a TCA Prescription | Did not have a TCA Prescription | Unweighted Standardized Differences | IPT Weighted Standardized Differences |
|------------------------------------------------------------------------------|----------------------------------|--------------|------------------------|---------------------------------|-------------------------------------|---------------------------------------|
|                                                                              |                                  |              | n (%)                  | n (%)                           |                                     |                                       |
| Age                                                                          |                                  |              |                        |                                 |                                     |                                       |
|                                                                              | 15-19                            |              | 62 (5.98)              | 8467 (8.01)                     | 0.08                                | 0.12                                  |
|                                                                              | 20-24                            |              | 144 (13.89)            | 14601 (13.81)                   | 0.00                                | 0.04                                  |
|                                                                              | 25-29                            |              | 245 (23.63)            | 23665 (22.38)                   | 0.03                                | 0.11                                  |
|                                                                              | 30-34                            |              | 313 (30.18)            | 32326 (30.57)                   | 0.01                                | 0.05                                  |
|                                                                              | 35-39                            |              | 197 (19)               | 20646 (19.52)                   | 0.01                                | 0.05                                  |
|                                                                              | 40-44                            |              | 76 (7.33)              | 6046 (5.72)                     | 0.07                                | 0.00                                  |
| Year                                                                         |                                  |              |                        |                                 |                                     |                                       |
|                                                                              | 2008 -2011                       |              | 449 (43.3)             | 46012 (43.51)                   | 0.00                                | 0.04                                  |
|                                                                              | 2012-2015                        |              | 588 (56.7)             | 59739 (56.49)                   | 0.00                                | 0.04                                  |
| <b>Medical Conditions in the year before a woman's last menstrual period</b> |                                  |              |                        |                                 |                                     |                                       |
|                                                                              | Sexually Transmitted Infection   |              | 21 (2.03)              | 2270 (2.15)                     | 0.01                                | 0.00                                  |
|                                                                              | Assisted Reproductive Technology | Suppressed   |                        | 742 (0.7)                       | -                                   | -                                     |
|                                                                              | Pelvic Infection                 |              | 20 (1.93)              | 1104 (1.04)                     | 0.07                                | 0.03                                  |
|                                                                              | Intrauterine Device              |              | 54 (5.21)              | 5407 (5.11)                     | 0.00                                | 0.04                                  |
|                                                                              | Smoking                          |              | 119 (11.48)            | 7718 (7.3)                      | 0.14                                | 0.06                                  |
| <b>Health in the year before a woman's last menstrual period</b>             |                                  |              |                        |                                 |                                     |                                       |
| Data Dimension                                                               | Code*                            | Recurrence** |                        |                                 |                                     |                                       |
| DX                                                                           | 346                              | Once         | 378 (36.45)            | 9026 (8.54)                     | 0.71                                | 0.15                                  |
| DX                                                                           | 789                              | Frequent     | 167 (16.1)             | 6551 (6.19)                     | 0.32                                | 0.15                                  |
| DX                                                                           | 346                              | Frequent     | 162 (15.62)            | 2409 (2.28)                     | 0.48                                | 0.06                                  |
| DX                                                                           | 789                              | Once         | 355 (34.23)            | 23943 (22.64)                   | 0.26                                | 0.17                                  |
| DX                                                                           | 784                              | Once         | 373 (35.97)            | 15644 (14.79)                   | 0.50                                | 0.19                                  |
| DX                                                                           | 784                              | Frequent     | 220 (21.22)            | 5901 (5.58)                     | 0.47                                | 0.15                                  |
| DX                                                                           | 729                              | Once         | 293 (28.25)            | 14177 (13.41)                   | 0.37                                | 0.10                                  |
| DX                                                                           | 729                              | Frequent     | 159 (15.33)            | 5757 (5.44)                     | 0.33                                | 0.12                                  |
| RX                                                                           | 00406051201                      | Once         | 84 (8.1)               | 4123 (3.9)                      | 0.18                                | 0.01                                  |
| DX                                                                           | 724                              | Once         | 296 (28.54)            | 18688 (17.67)                   | 0.26                                | 0.13                                  |
| DX                                                                           | 787                              | Once         | 272 (26.23)            | 15578 (14.73)                   | 0.29                                | 0.05                                  |
| DX                                                                           | 625                              | Once         | 239 (23.05)            | 16339 (15.45)                   | 0.19                                | 0.06                                  |
| DX                                                                           | 787                              | Frequent     | 138 (13.31)            | 5741 (5.43)                     | 0.27                                | 0.05                                  |
| DX                                                                           | 338                              | Once         | 102 (9.84)             | 3354 (3.17)                     | 0.27                                | 0.13                                  |
| DX                                                                           | 625                              | Frequent     | 128 (12.34)            | 6267 (5.93)                     | 0.22                                | 0.11                                  |
| DX                                                                           | 780                              | Once         | 514 (49.57)            | 34597 (32.72)                   | 0.35                                | 0.17                                  |
| DX                                                                           | 724                              | Sporadic     | 174 (16.78)            | 10688 (10.11)                   | 0.20                                | 0.10                                  |
| DX                                                                           | 628                              | Once         | 55 (5.3)               | 8463 (8)                        | 0.11                                | 0.08                                  |
| DX                                                                           | 401                              | Once         | 101 (9.74)             | 6407 (6.06)                     | 0.14                                | 0.11                                  |
| DX                                                                           | 617                              | Once         | 48 (4.63)              | 2223 (2.1)                      | 0.14                                | 0.10                                  |
| DX                                                                           | 530                              | Once         | 131 (12.63)            | 7265 (6.87)                     | 0.20                                | 0.09                                  |
| DX                                                                           | 782                              | Once         | 156 (15.04)            | 8651 (8.18)                     | 0.22                                | 0.03                                  |
| RX                                                                           | 00603254421                      | Once         | 27 (2.6)               | 616 (0.58)                      | 0.16                                | 0.01                                  |
| DX                                                                           | 719                              | Once         | 259 (24.98)            | 15482 (14.64)                   | 0.26                                | 0.04                                  |
| RX                                                                           | 00378075110                      | Once         | 48 (4.63)              | 1970 (1.86)                     | 0.16                                | 0.10                                  |
| RX                                                                           | 59746017710                      | Once         | 60 (5.79)              | 1906 (1.8)                      | 0.21                                | 0.09                                  |
| DX                                                                           | 628                              | Sporadic     | 27 (2.6)               | 4611 (4.36)                     | 0.10                                | 0.09                                  |
| RX                                                                           | 00378191210                      | Once         | 28 (2.7)               | 651 (0.62)                      | 0.16                                | 0.05                                  |
| DX                                                                           | 723                              | Once         | 204 (19.67)            | 10381 (9.82)                    | 0.28                                | 0.05                                  |
| DX                                                                           | 722                              | Once         | 97 (9.35)              | 4388 (4.15)                     | 0.21                                | 0.06                                  |
| RX                                                                           | 00378191210                      | Sporadic     | 19 (1.83)              | 382 (0.36)                      | 0.14                                | 0.03                                  |

|    |             |          |             |               |      |      |
|----|-------------|----------|-------------|---------------|------|------|
| DX | 401         | Sporadic | 69 (6.65)   | 3719 (3.52)   | 0.14 | 0.11 |
| DX | 786         | Once     | 284 (27.39) | 19690 (18.62) | 0.21 | 0.16 |
| RX | 59746000103 | Once     | 63 (6.08)   | 3254 (3.08)   | 0.14 | 0.02 |
| RX | 00603388728 | Once     | 19 (1.83)   | 563 (0.53)    | 0.12 | 0.06 |
| DX | 780         | Frequent | 294 (28.35) | 14764 (13.96) | 0.36 | 0.22 |
| RX | 00093007401 | Once     | 74 (7.14)   | 3216 (3.04)   | 0.19 | 0.06 |
| DX | 614         | Once     | 29 (2.8)    | 1553 (1.47)   | 0.09 | 0.00 |
| RX | 00093005805 | Once     | 33 (3.18)   | 1083 (1.02)   | 0.15 | 0.01 |
| DX | 620         | Once     | 104 (10.03) | 7519 (7.11)   | 0.10 | 0.08 |
| DX | 719         | Frequent | 76 (7.33)   | 4376 (4.14)   | 0.14 | 0.02 |
| DX | 788         | Once     | 168 (16.2)  | 10145 (9.59)  | 0.20 | 0.10 |
| RX | 00781183001 | Once     | 71 (6.85)   | 3134 (2.96)   | 0.18 | 0.05 |
| DX | 535         | Once     | 63 (6.08)   | 3293 (3.11)   | 0.14 | 0.04 |
| RX | 00093007401 | Sporadic | 47 (4.53)   | 1733 (1.64)   | 0.17 | 0.05 |
| DX | 785         | Frequent | 55 (5.3)    | 2506 (2.37)   | 0.15 | 0.11 |
| DX | 786         | Frequent | 107 (10.32) | 6779 (6.41)   | 0.14 | 0.11 |
| DX | 564         | Frequent | 66 (6.36)   | 2043 (1.93)   | 0.22 | 0.07 |
| DX | V58         | Once     | 171 (16.49) | 8685 (8.21)   | 0.25 | 0.10 |
| DX | 305         | Once     | 141 (13.6)  | 9481 (8.97)   | 0.15 | 0.07 |
| DX | 338         | Frequent | 61 (5.88)   | 1059 (1)      | 0.27 | 0.02 |
| DX | 569         | Once     | 45 (4.34)   | 2270 (2.15)   | 0.12 | 0.06 |
| DX | 300         | Once     | 466 (44.94) | 34635 (32.75) | 0.25 | 0.18 |
| DX | 626         | Frequent | 142 (13.69) | 11459 (10.84) | 0.09 | 0.11 |
| DX | 536         | Frequent | 18 (1.74)   | 438 (0.41)    | 0.13 | 0.02 |
| RX | 00093007401 | Frequent | 31 (2.99)   | 844 (0.8)     | 0.16 | 0.07 |
| DX | 728         | Once     | 107 (10.32) | 5881 (5.56)   | 0.18 | 0.05 |
| RX | 00378191210 | Frequent | Suppressed  | 184 (0.17)    | -    | -    |
| DX | 592         | Sporadic | 22 (2.12)   | 911 (0.86)    | 0.10 | 0.08 |
| DX | 300         | Sporadic | 305 (29.41) | 20354 (19.25) | 0.24 | 0.18 |

NOTE: This table presents the top 60 health variables included in the HDPS model – contact the authors for the full list of 500 variables included

NOTE: Cells with fewer than 15 observations are suppressed to maintain confidentiality

Abbreviations: DX = diagnosis, PR = Procedure, RX = pharmaceutical

\* ICD-9 diagnosis codes Inpatient and Outpatient DX codes, ICD-9 Procedure codes for Inpatient and outpatient PR codes, NDC codes for Outpatient RX codes

\*\*Once – if the code appeared at least once within one year; sporadic – if code appeared at least more than the median; frequent – if the code appeared more than the 75<sup>th</sup> percentile

**eTable 11. Baseline Demographic and Health Characteristics, Pre-Pregnancy Depression Cohort, Any ‘Other’ Antidepressant**

| Characteristics at the End of Pregnancy                                      | Had an ‘Other’ Antidepressant Prescription | Did not have an ‘Other’ Antidepressant Prescription | Unweighted Standardized Differences | IPT Weighted Standardized Differences |      |      |
|------------------------------------------------------------------------------|--------------------------------------------|-----------------------------------------------------|-------------------------------------|---------------------------------------|------|------|
|                                                                              | n (%)                                      | n (%)                                               |                                     |                                       |      |      |
| <b>Age</b>                                                                   |                                            |                                                     |                                     |                                       |      |      |
| 15-19                                                                        | 431 (4.57)                                 | 8098 (8.32)                                         | 0.15                                | 0.00                                  |      |      |
| 20-24                                                                        | 1004 (10.64)                               | 13741 (14.11)                                       | 0.11                                | 0.00                                  |      |      |
| 25-29                                                                        | 1840 (19.51)                               | 22070 (22.67)                                       | 0.08                                | 0.00                                  |      |      |
| 30-34                                                                        | 3142 (33.31)                               | 29497 (30.3)                                        | 0.06                                | 0.00                                  |      |      |
| 35-39                                                                        | 2263 (23.99)                               | 18580 (19.08)                                       | 0.12                                | 0.01                                  |      |      |
| 40-44                                                                        | 752 (7.97)                                 | 5370 (5.52)                                         | 0.10                                | 0.00                                  |      |      |
| <b>Year</b>                                                                  |                                            |                                                     |                                     |                                       |      |      |
| 2008 -2011                                                                   | 3919 (41.55)                               | 42542 (43.7)                                        | 0.04                                | 0.00                                  |      |      |
| 2012-2015                                                                    | 5513 (58.45)                               | 54814 (56.3)                                        | 0.04                                | 0.00                                  |      |      |
| <b>Medical Conditions in the year before a woman’s last menstrual period</b> |                                            |                                                     |                                     |                                       |      |      |
| Sexually Transmitted Infection                                               | 193 (2.05)                                 | 2098 (2.15)                                         | 0.01                                | 0.00                                  |      |      |
| Assisted Reproductive Technology                                             | 65 (0.69)                                  | 681 (0.7)                                           | 0.00                                | 0.01                                  |      |      |
| Pelvic Infection                                                             | 89 (0.94)                                  | 1035 (1.06)                                         | 0.01                                | 0.00                                  |      |      |
| Intrauterine Device                                                          | 538 (5.7)                                  | 4923 (5.06)                                         | 0.03                                | 0.01                                  |      |      |
| Smoking                                                                      | 736 (7.8)                                  | 7101 (7.29)                                         | 0.02                                | 0.00                                  |      |      |
| <b>Health in the year before a woman’s last menstrual period</b>             |                                            |                                                     |                                     |                                       |      |      |
| Data Dimension                                                               | Code*                                      | Recurrence**                                        |                                     |                                       |      |      |
| DX                                                                           | 314                                        | Once                                                | 777 (8.24)                          | 5092 (5.23)                           | 0.12 | 0.01 |
| DX                                                                           | 296                                        | Once                                                | 1145 (12.14)                        | 7294 (7.49)                           | 0.16 | 0.02 |
| DX                                                                           | 401                                        | Once                                                | 694 (7.36)                          | 5814 (5.97)                           | 0.06 | 0.01 |
| RX                                                                           | 00093007401                                | Once                                                | 475 (5.04)                          | 2815 (2.89)                           | 0.11 | 0.01 |
| RX                                                                           | 00093007401                                | Sporadic                                            | 296 (3.14)                          | 1484 (1.52)                           | 0.11 | 0.01 |
| RX                                                                           | 00406051201                                | Once                                                | 459 (4.87)                          | 3748 (3.85)                           | 0.05 | 0.00 |
| RX                                                                           | 00378191210                                | Once                                                | 134 (1.42)                          | 545 (0.56)                            | 0.09 | 0.01 |
| DX                                                                           | 780                                        | Once                                                | 3484 (36.94)                        | 31627 (32.49)                         | 0.09 | 0.01 |
| DX                                                                           | 724                                        | Sporadic                                            | 1108 (11.75)                        | 9754 (10.02)                          | 0.06 | 0.02 |
| RX                                                                           | 00378191210                                | Sporadic                                            | 82 (0.87)                           | 319 (0.33)                            | 0.07 | 0.01 |
| DX                                                                           | 296                                        | Sporadic                                            | 646 (6.85)                          | 3875 (3.98)                           | 0.13 | 0.03 |
| DX                                                                           | 626                                        | Once                                                | 2153 (22.83)                        | 24556 (25.22)                         | 0.06 | 0.00 |
| DX                                                                           | 616                                        | Once                                                | 1034 (10.96)                        | 12552 (12.89)                         | 0.06 | 0.01 |
| DX                                                                           | 724                                        | Once                                                | 1859 (19.71)                        | 17125 (17.59)                         | 0.05 | 0.01 |
| DX                                                                           | 629                                        | Frequent                                            | 19 (0.2)                            | 488 (0.5)                             | 0.05 | 0.00 |
| DX                                                                           | 401                                        | Sporadic                                            | 423 (4.48)                          | 3365 (3.46)                           | 0.05 | 0.01 |
| RX                                                                           | 59746000103                                | Once                                                | 376 (3.99)                          | 2941 (3.02)                           | 0.05 | 0.01 |
| DX                                                                           | 314                                        | Sporadic                                            | 529 (5.61)                          | 3445 (3.54)                           | 0.10 | 0.02 |
| DX                                                                           | V58                                        | Once                                                | 1064 (11.28)                        | 7792 (8)                              | 0.11 | 0.01 |
| DX                                                                           | 327                                        | Once                                                | 282 (2.99)                          | 1757 (1.8)                            | 0.08 | 0.01 |
| DX                                                                           | 305                                        | Once                                                | 1016 (10.77)                        | 8606 (8.84)                           | 0.07 | 0.01 |
| PR                                                                           | 196                                        | Once                                                | 356 (3.77)                          | 5267 (5.41)                           | 0.08 | 0.00 |
| DX                                                                           | V23                                        | Frequent                                            | 74 (0.78)                           | 1222 (1.26)                           | 0.05 | 0.00 |
| DX                                                                           | 722                                        | Once                                                | 528 (5.6)                           | 3957 (4.06)                           | 0.07 | 0.01 |
| DX                                                                           | 626                                        | Frequent                                            | 918 (9.73)                          | 10683 (10.97)                         | 0.04 | 0.00 |
| RX                                                                           | 00555032302                                | Frequent                                            | 34 (0.36)                           | 119 (0.12)                            | 0.05 | 0.01 |
| DX                                                                           | 729                                        | Once                                                | 1439 (15.26)                        | 13031 (13.38)                         | 0.05 | 0.01 |
| DX                                                                           | V20                                        | Once                                                | 82 (0.87)                           | 1564 (1.61)                           | 0.07 | 0.01 |
| DX                                                                           | 650                                        | Once                                                | 238 (2.52)                          | 3699 (3.8)                            | 0.07 | 0.00 |
| DX                                                                           | 729                                        | Frequent                                            | 641 (6.8)                           | 5275 (5.42)                           | 0.06 | 0.00 |

|    |             |          |              |               |      |      |
|----|-------------|----------|--------------|---------------|------|------|
| DX | 300         | Sporadic | 2180 (23.11) | 18479 (18.98) | 0.10 | 0.02 |
| DX | V23         | Sporadic | 133 (1.41)   | 1911 (1.96)   | 0.04 | 0.01 |
| RX | 00603388728 | Once     | 81 (0.86)    | 501 (0.51)    | 0.04 | 0.00 |
| DX | 629         | Once     | 130 (1.38)   | 1706 (1.75)   | 0.03 | 0.01 |
| DX | 780         | Frequent | 1652 (17.51) | 13406 (13.77) | 0.10 | 0.01 |
| RX | 00781183001 | Once     | 382 (4.05)   | 2823 (2.9)    | 0.06 | 0.01 |
| DX | 628         | Sporadic | 373 (3.95)   | 4265 (4.38)   | 0.02 | 0.00 |
| DX | 719         | Frequent | 470 (4.98)   | 3982 (4.09)   | 0.04 | 0.01 |
| RX | 13668000805 | Once     | 172 (1.82)   | 712 (0.73)    | 0.10 | 0.01 |
| RX | 00378075110 | Once     | 232 (2.46)   | 1786 (1.83)   | 0.04 | 0.00 |
| RX | 00093007401 | Frequent | 145 (1.54)   | 730 (0.75)    | 0.07 | 0.01 |
| RX | 00093005805 | Once     | 148 (1.57)   | 968 (0.99)    | 0.05 | 0.00 |
| DX | 300         | Once     | 3456 (36.64) | 31645 (32.5)  | 0.09 | 0.01 |
| DX | V22         | Sporadic | 443 (4.7)    | 7015 (7.21)   | 0.11 | 0.01 |
| RX | 16252051501 | Once     | 441 (4.68)   | 3244 (3.33)   | 0.07 | 0.01 |
| RX | 59417010510 | Once     | 97 (1.03)    | 418 (0.43)    | 0.07 | 0.01 |
| RX | 64720013510 | Once     | 92 (0.98)    | 449 (0.46)    | 0.06 | 0.01 |
| DX | 640         | Once     | 526 (5.58)   | 7050 (7.24)   | 0.07 | 0.00 |
| PR | 5940        | Once     | 235 (2.49)   | 3701 (3.8)    | 0.08 | 0.01 |
| DX | V23         | Once     | 263 (2.79)   | 3635 (3.73)   | 0.05 | 0.02 |
| DX | 305         | Frequent | 471 (4.99)   | 3685 (3.79)   | 0.06 | 0.01 |
| DX | 723         | Once     | 1108 (11.75) | 9477 (9.73)   | 0.07 | 0.00 |
| RX | 13668000805 | Sporadic | 104 (1.1)    | 385 (0.4)     | 0.08 | 0.01 |
| DX | 789         | Once     | 2062 (21.86) | 22236 (22.84) | 0.02 | 0.01 |
| DX | 346         | Once     | 951 (10.08)  | 8453 (8.68)   | 0.05 | 0.01 |
| DX | 628         | Frequent | 169 (1.79)   | 2088 (2.14)   | 0.03 | 0.01 |
| DX | 530         | Once     | 732 (7.76)   | 6664 (6.84)   | 0.04 | 0.01 |
| DX | 278         | Once     | 804 (8.52)   | 7047 (7.24)   | 0.05 | 0.00 |
| RX | 59746017710 | Once     | 239 (2.53)   | 1727 (1.77)   | 0.05 | 0.00 |
| RX | 67253090150 | Frequent | 50 (0.53)    | 261 (0.27)    | 0.04 | 0.00 |

NOTE: This table presents the top 60 health variables included in the HDPS model – contact the authors for the full list of 500 variables included

NOTE: Cells with fewer than 15 observations are suppressed to maintain confidentiality

Abbreviations: DX = diagnosis, PR = Procedure, RX = pharmaceutical

\* ICD-9 diagnosis codes Inpatient and Outpatient DX codes, ICD-9 Procedure codes for Inpatient and outpatient PR codes, NDC codes for Outpatient RX codes

\*\*Once – if the code appeared at least once within one year; sporadic – if code appeared at least more than the median; frequent – if the code appeared more than the 75<sup>th</sup> percentile

**eTable 12. Baseline Demographic and Health Characteristics, Full Cohort, Pre-Pregnancy Depression**

| Characteristics at the End of Pregnancy                                      |                                  |              | Had Pre-Pregnancy Depression | Did not have Pre-Pregnancy Depression | Unweighted Standardized Differences | IPT Weighted Standardized Differences |
|------------------------------------------------------------------------------|----------------------------------|--------------|------------------------------|---------------------------------------|-------------------------------------|---------------------------------------|
|                                                                              |                                  |              | n (%)                        | n (%)                                 |                                     |                                       |
| <b>Age</b>                                                                   |                                  |              |                              |                                       |                                     |                                       |
|                                                                              | 15-19                            |              | 8529 (7.99)                  | 75799 (4.75)                          | 0.13                                | 0.01                                  |
|                                                                              | 20-24                            |              | 14745 (13.81)                | 185847 (11.64)                        | 0.07                                | 0.01                                  |
|                                                                              | 25-29                            |              | 23910 (22.39)                | 429593 (26.91)                        | 0.11                                | 0.02                                  |
|                                                                              | 30-34                            |              | 32639 (30.56)                | 540259 (33.84)                        | 0.07                                | 0.01                                  |
|                                                                              | 35-39                            |              | 20843 (19.52)                | 287441 (18)                           | 0.04                                | 0.02                                  |
|                                                                              | 40-44                            |              | 6122 (5.73)                  | 77518 (4.86)                          | 0.04                                | 0.02                                  |
| <b>Year</b>                                                                  |                                  |              |                              |                                       |                                     |                                       |
|                                                                              | 2008 -2011                       |              | 46461 (43.51)                | 724275 (45.37)                        | 0.04                                | 0.00                                  |
|                                                                              | 2012-2015                        |              | 60327 (56.49)                | 872182 (54.63)                        | 0.04                                | 0.00                                  |
| <b>Medical Conditions in the year before a woman's last menstrual period</b> |                                  |              |                              |                                       |                                     |                                       |
|                                                                              | Sexually Transmitted Infection   |              | 2291 (2.15)                  | 21198 (1.33)                          | 0.06                                | 0.01                                  |
|                                                                              | Assisted Reproductive Technology |              | 746 (0.7)                    | 12228 (0.77)                          | 0.01                                | 0.01                                  |
|                                                                              | Pelvic Infection                 |              | 1124 (1.05)                  | 8081 (0.51)                           | 0.06                                | 0.01                                  |
|                                                                              | Intrauterine Device              |              | 5461 (5.11)                  | 56221 (3.52)                          | 0.08                                | 0.02                                  |
|                                                                              | Smoking                          |              | 7837 (7.34)                  | 32657 (2.05)                          | 0.25                                | 0.03                                  |
| <b>Health in the year before a woman's last menstrual period</b>             |                                  |              |                              |                                       |                                     |                                       |
| Data Dimension                                                               | Code*                            | Recurrence** |                              |                                       |                                     |                                       |
| DX                                                                           | 300                              | Once         | 35101 (32.87)                | 72512 (4.54)                          | 0.78                                | 0.03                                  |
| DX                                                                           | 305                              | Once         | 9622 (9.01)                  | 30014 (1.88)                          | 0.32                                | 0.02                                  |
| DX                                                                           | 780                              | Once         | 35111 (32.88)                | 231825 (14.52)                        | 0.44                                | 0.07                                  |
| DX                                                                           | 300                              | Sporadic     | 20659 (19.35)                | 33320 (2.09)                          | 0.58                                | 0.01                                  |
| DX                                                                           | 789                              | Once         | 24298 (22.75)                | 206232 (12.92)                        | 0.26                                | 0.04                                  |
| DX                                                                           | 625                              | Once         | 16578 (15.52)                | 152224 (9.54)                         | 0.18                                | 0.04                                  |
| DX                                                                           | 789                              | Frequent     | 11967 (11.21)                | 83898 (5.26)                          | 0.22                                | 0.03                                  |
| DX                                                                           | 780                              | Frequent     | 15058 (14.1)                 | 70351 (4.41)                          | 0.34                                | 0.04                                  |
| DX                                                                           | 786                              | Once         | 19974 (18.7)                 | 163742 (10.26)                        | 0.24                                | 0.05                                  |
| DX                                                                           | 278                              | Once         | 7851 (7.35)                  | 47765 (2.99)                          | 0.20                                | 0.03                                  |
| DX                                                                           | 625                              | Frequent     | 6395 (5.99)                  | 50375 (3.16)                          | 0.14                                | 0.02                                  |
| DX                                                                           | 787                              | Once         | 15850 (14.84)                | 107572 (6.74)                         | 0.26                                | 0.04                                  |
| DX                                                                           | 300                              | Frequent     | 14242 (13.34)                | 20899 (1.31)                          | 0.47                                | 0.00                                  |
| DX                                                                           | 626                              | Once         | 26709 (25.01)                | 315990 (19.79)                        | 0.13                                | 0.03                                  |
| DX                                                                           | 305                              | Frequent     | 4156 (3.89)                  | 8026 (0.5)                            | 0.23                                | 0.00                                  |
| DX                                                                           | 729                              | Once         | 14470 (13.55)                | 108781 (6.81)                         | 0.22                                | 0.05                                  |
| DX                                                                           | 784                              | Once         | 16017 (15)                   | 116510 (7.3)                          | 0.25                                | 0.05                                  |
| DX                                                                           | 309                              | Once         | 14351 (13.44)                | 41597 (2.61)                          | 0.41                                | 0.03                                  |
| DX                                                                           | 724                              | Once         | 18984 (17.78)                | 148194 (9.28)                         | 0.25                                | 0.05                                  |
| DX                                                                           | 401                              | Once         | 6508 (6.09)                  | 51595 (3.23)                          | 0.14                                | 0.03                                  |
| DX                                                                           | 530                              | Once         | 7396 (6.93)                  | 49113 (3.08)                          | 0.18                                | 0.04                                  |
| DX                                                                           | 620                              | Once         | 7623 (7.14)                  | 80746 (5.06)                          | 0.09                                | 0.02                                  |
| DX                                                                           | V58                              | Once         | 8856 (8.29)                  | 48787 (3.06)                          | 0.23                                | 0.03                                  |
| DX                                                                           | 616                              | Once         | 13586 (12.72)                | 138981 (8.71)                         | 0.13                                | 0.03                                  |
| DX                                                                           | 719                              | Once         | 15741 (14.74)                | 127954 (8.01)                         | 0.21                                | 0.04                                  |
| DX                                                                           | 786                              | Frequent     | 6886 (6.45)                  | 44437 (2.78)                          | 0.18                                | 0.04                                  |
| DX                                                                           | 346                              | Once         | 9404 (8.81)                  | 55529 (3.48)                          | 0.22                                | 0.04                                  |

|    |             |          |               |                |      |      |
|----|-------------|----------|---------------|----------------|------|------|
| DX | 278         | Frequent | 3564 (3.34)   | 16874 (1.06)   | 0.16 | 0.02 |
| DX | 626         | Frequent | 11601 (10.86) | 134104 (8.4)   | 0.08 | 0.03 |
| DX | 401         | Sporadic | 3788 (3.55)   | 27185 (1.7)    | 0.12 | 0.02 |
| DX | 724         | Sporadic | 10862 (10.17) | 78295 (4.9)    | 0.20 | 0.04 |
| DX | 599         | Once     | 17806 (16.67) | 170215 (10.66) | 0.18 | 0.03 |
| DX | V74         | Once     | 10509 (9.84)  | 103634 (6.49)  | 0.12 | 0.02 |
| DX | 614         | Once     | 1582 (1.48)   | 15482 (0.97)   | 0.05 | 0.01 |
| DX | 784         | Frequent | 6121 (5.73)   | 35915 (2.25)   | 0.18 | 0.03 |
| DX | 787         | Frequent | 5879 (5.51)   | 30831 (1.93)   | 0.19 | 0.03 |
| DX | 346         | Frequent | 4484 (4.2)    | 21056 (1.32)   | 0.18 | 0.02 |
| DX | 788         | Once     | 10313 (9.66)  | 85507 (5.36)   | 0.16 | 0.02 |
| DX | 729         | Frequent | 5916 (5.54)   | 37844 (2.37)   | 0.16 | 0.03 |
| DX | 309         | Sporadic | 8138 (7.62)   | 24098 (1.51)   | 0.30 | 0.02 |
| DX | 493         | Once     | 8407 (7.87)   | 61527 (3.85)   | 0.17 | 0.03 |
| DX | 401         | Frequent | 2479 (2.32)   | 15859 (0.99)   | 0.10 | 0.02 |
| DX | 530         | Frequent | 2809 (2.63)   | 16175 (1.01)   | 0.12 | 0.03 |
| DX | 268         | Once     | 4151 (3.89)   | 32529 (2.04)   | 0.11 | 0.02 |
| RX | 00093007401 | Once     | 3290 (3.08)   | 9467 (0.59)    | 0.19 | 0.02 |
| DX | 272         | Once     | 7387 (6.92)   | 65092 (4.08)   | 0.12 | 0.03 |
| RX | 00093083201 | Once     | 2962 (2.77)   | 4296 (0.27)    | 0.21 | 0.01 |
| DX | 623         | Once     | 7184 (6.73)   | 69412 (4.35)   | 0.10 | 0.02 |
| DX | 338         | Once     | 3456 (3.24)   | 19067 (1.19)   | 0.14 | 0.01 |
| DX | 782         | Once     | 8807 (8.25)   | 71910 (4.5)    | 0.15 | 0.04 |
| DX | 959         | Once     | 5924 (5.55)   | 37211 (2.33)   | 0.17 | 0.02 |
| DX | 783         | Once     | 5554 (5.2)    | 32512 (2.04)   | 0.17 | 0.03 |
| DX | 256         | Once     | 5280 (4.94)   | 65641 (4.11)   | 0.04 | 0.02 |
| DX | 723         | Once     | 10585 (9.91)  | 82239 (5.15)   | 0.18 | 0.04 |
| DX | 617         | Once     | 2271 (2.13)   | 22281 (1.4)    | 0.06 | 0.01 |
| DX | V58         | Frequent | 2942 (2.75)   | 14254 (0.89)   | 0.14 | 0.02 |
| DX | 493         | Frequent | 3736 (3.5)    | 23439 (1.47)   | 0.13 | 0.02 |
| DX | 620         | Frequent | 2853 (2.67)   | 29651 (1.86)   | 0.05 | 0.01 |
| DX | 785         | Once     | 7153 (6.7)    | 56448 (3.54)   | 0.14 | 0.04 |
| RX | 65162062711 | Once     | 1771 (1.66)   | 9807 (0.61)    | 0.10 | 0.01 |

NOTE: This table presents the top 60 health variables included in the HDPS model – contact the authors for the full list of 500 variables included

NOTE: Cells with fewer than 15 observations are suppressed to maintain confidentiality

Abbreviations: DX = diagnosis, PR = Procedure, RX = pharmaceutical

\* ICD-9 diagnosis codes Inpatient and Outpatient DX codes, ICD-9 Procedure codes for Inpatient and outpatient PR codes, NDC codes for Outpatient RX codes

\*\*Once – if the code appeared at least once within one year; sporadic – if code appeared at least more than the median; frequent – if the code appeared more than the 75<sup>th</sup> percentile

**eTable 13. Baseline Demographic and Health Characteristics, No Pre-Pregnancy Depression Cohort, Any Antidepressant**

| Characteristics at the End of Pregnancy                                      |       |              | Had an Antidepressant Prescription | Did not have an Antidepressant Prescription | Unweighted Standardized Differences | IPT Weighted Standardized Differences |
|------------------------------------------------------------------------------|-------|--------------|------------------------------------|---------------------------------------------|-------------------------------------|---------------------------------------|
|                                                                              |       |              | n (%)                              | n (%)                                       |                                     |                                       |
| <b>Age</b>                                                                   |       |              |                                    |                                             |                                     |                                       |
| 15-19                                                                        |       |              | 1715 (2.82)                        | 74084 (4.82)                                | 0.10                                | 0.02                                  |
| 20-24                                                                        |       |              | 5343 (8.78)                        | 180504 (11.75)                              | 0.10                                | 0.02                                  |
| 25-29                                                                        |       |              | 14701 (24.17)                      | 414892 (27.02)                              | 0.07                                | 0.02                                  |
| 30-34                                                                        |       |              | 21552 (35.43)                      | 518707 (33.78)                              | 0.03                                | 0.01                                  |
| 35-39                                                                        |       |              | 13463 (22.13)                      | 273978 (17.84)                              | 0.11                                | 0.02                                  |
| 40-44                                                                        |       |              | 4055 (6.67)                        | 73463 (4.78)                                | 0.08                                | 0.02                                  |
| <b>Year</b>                                                                  |       |              |                                    |                                             |                                     |                                       |
| 2008 -2011                                                                   |       |              | 28073 (46.15)                      | 696202 (45.34)                              | 0.02                                | 0.01                                  |
| 2012-2015                                                                    |       |              | 32756 (53.85)                      | 839426 (54.66)                              | 0.02                                | 0.01                                  |
| <b>Medical Conditions in the year before a woman's last menstrual period</b> |       |              |                                    |                                             |                                     |                                       |
| Sexually Transmitted Infection                                               |       |              | 839 (1.38)                         | 20359 (1.33)                                | 0.00                                | 0.01                                  |
| Assisted Reproductive Technology                                             |       |              | 451 (0.74)                         | 11777 (0.77)                                | 0.00                                | 0.01                                  |
| Pelvic Infection                                                             |       |              | 357 (0.59)                         | 7724 (0.5)                                  | 0.01                                | 0.02                                  |
| Intrauterine Device                                                          |       |              | 2896 (4.76)                        | 53325 (3.47)                                | 0.06                                | 0.02                                  |
| Smoking                                                                      |       |              | 2502 (4.11)                        | 30155 (1.96)                                | 0.13                                | 0.04                                  |
| <b>Health in the year before a woman's last menstrual period</b>             |       |              |                                    |                                             |                                     |                                       |
| Data Dimension                                                               | Code* | Recurrence** |                                    |                                             |                                     |                                       |
| DX                                                                           | 300   | Once         | 17395 (28.6)                       | 55117 (3.59)                                | 0.72                                | 0.05                                  |
| DX                                                                           | 780   | Once         | 17466 (28.71)                      | 214359 (13.96)                              | 0.37                                | 0.09                                  |
| DX                                                                           | 625   | Once         | 7991 (13.14)                       | 144233 (9.39)                               | 0.12                                | 0.07                                  |
| DX                                                                           | 789   | Once         | 11011 (18.1)                       | 195221 (12.71)                              | 0.15                                | 0.06                                  |
| DX                                                                           | 401   | Once         | 3803 (6.25)                        | 47792 (3.11)                                | 0.15                                | 0.03                                  |
| DX                                                                           | 780   | Frequent     | 6857 (11.27)                       | 63494 (4.13)                                | 0.27                                | 0.07                                  |
| DX                                                                           | 786   | Once         | 9539 (15.68)                       | 154203 (10.04)                              | 0.17                                | 0.07                                  |
| DX                                                                           | 305   | Once         | 2496 (4.1)                         | 27518 (1.79)                                | 0.14                                | 0.04                                  |
| DX                                                                           | 346   | Once         | 5601 (9.21)                        | 49928 (3.25)                                | 0.25                                | 0.06                                  |
| DX                                                                           | 789   | Frequent     | 5184 (8.52)                        | 78714 (5.13)                                | 0.14                                | 0.05                                  |
| DX                                                                           | 784   | Once         | 8041 (13.22)                       | 108469 (7.06)                               | 0.20                                | 0.07                                  |
| DX                                                                           | 729   | Once         | 7163 (11.78)                       | 101618 (6.62)                               | 0.18                                | 0.06                                  |
| DX                                                                           | 530   | Once         | 3801 (6.25)                        | 45312 (2.95)                                | 0.16                                | 0.05                                  |
| DX                                                                           | 625   | Frequent     | 2868 (4.71)                        | 47507 (3.09)                                | 0.08                                | 0.05                                  |
| DX                                                                           | 787   | Once         | 7199 (11.83)                       | 100373 (6.54)                               | 0.18                                | 0.06                                  |
| DX                                                                           | 401   | Sporadic     | 2111 (3.47)                        | 25074 (1.63)                                | 0.12                                | 0.03                                  |
| DX                                                                           | V58   | Once         | 4150 (6.82)                        | 44637 (2.91)                                | 0.18                                | 0.04                                  |
| DX                                                                           | 724   | Once         | 9229 (15.17)                       | 138965 (9.05)                               | 0.19                                | 0.06                                  |
| DX                                                                           | 719   | Once         | 7742 (12.73)                       | 120212 (7.83)                               | 0.16                                | 0.05                                  |
| DX                                                                           | 346   | Frequent     | 2702 (4.44)                        | 18354 (1.2)                                 | 0.20                                | 0.05                                  |
| DX                                                                           | 786   | Frequent     | 3164 (5.2)                         | 41273 (2.69)                                | 0.13                                | 0.06                                  |
| DX                                                                           | 300   | Frequent     | 6110 (10.04)                       | 14789 (0.96)                                | 0.41                                | 0.02                                  |
| DX                                                                           | 272   | Once         | 4180 (6.87)                        | 60912 (3.97)                                | 0.13                                | 0.03                                  |
| DX                                                                           | 256   | Once         | 3033 (4.99)                        | 62608 (4.08)                                | 0.04                                | 0.03                                  |
| DX                                                                           | 278   | Once         | 2742 (4.51)                        | 45023 (2.93)                                | 0.08                                | 0.03                                  |
| DX                                                                           | 620   | Once         | 3706 (6.09)                        | 77040 (5.02)                                | 0.05                                | 0.04                                  |
| DX                                                                           | 784   | Frequent     | 3135 (5.15)                        | 32780 (2.13)                                | 0.16                                | 0.06                                  |
| DX                                                                           | 626   | Once         | 13270 (21.82)                      | 302720 (19.71)                              | 0.05                                | 0.06                                  |
| DX                                                                           | 296   | Once         | 2971 (4.88)                        | 8113 (0.53)                                 | 0.27                                | 0.03                                  |
| DX                                                                           | 617   | Once         | 1291 (2.12)                        | 20990 (1.37)                                | 0.06                                | 0.02                                  |
| DX                                                                           | 309   | Once         | 5102 (8.39)                        | 36495 (2.38)                                | 0.27                                | 0.07                                  |

|    |             |          |              |                |      |      |
|----|-------------|----------|--------------|----------------|------|------|
| RX | 65162062711 | Once     | 991 (1.63)   | 8816 (0.57)    | 0.10 | 0.03 |
| DX | 530         | Frequent | 1368 (2.25)  | 14807 (0.96)   | 0.10 | 0.04 |
| DX | 244         | Once     | 5157 (8.48)  | 77777 (5.06)   | 0.14 | 0.04 |
| DX | 401         | Frequent | 1229 (2.02)  | 14630 (0.95)   | 0.09 | 0.02 |
| RX | 00228202996 | Once     | 1020 (1.68)  | 3848 (0.25)    | 0.15 | 0.03 |
| DX | 724         | Sporadic | 5188 (8.53)  | 73107 (4.76)   | 0.15 | 0.05 |
| RX | 00093083201 | Once     | 1408 (2.31)  | 2888 (0.19)    | 0.19 | 0.02 |
| DX | 729         | Frequent | 2896 (4.76)  | 34948 (2.28)   | 0.14 | 0.04 |
| DX | 723         | Once     | 5718 (9.4)   | 76521 (4.98)   | 0.17 | 0.05 |
| DX | 785         | Once     | 3761 (6.18)  | 52687 (3.43)   | 0.13 | 0.05 |
| RX | 00093007401 | Frequent | 743 (1.22)   | 2295 (0.15)    | 0.13 | 0.01 |
| RX | 00093007401 | Once     | 1718 (2.82)  | 7749 (0.5)     | 0.18 | 0.03 |
| RX | 00378034505 | Once     | 918 (1.51)   | 8634 (0.56)    | 0.09 | 0.02 |
| DX | V58         | Frequent | 1286 (2.11)  | 12968 (0.84)   | 0.11 | 0.03 |
| DX | 788         | Once     | 4817 (7.92)  | 80690 (5.25)   | 0.11 | 0.04 |
| DX | 599         | Once     | 8204 (13.49) | 162011 (10.55) | 0.09 | 0.04 |
| DX | 722         | Once     | 2325 (3.82)  | 26751 (1.74)   | 0.13 | 0.04 |
| DX | 787         | Frequent | 2510 (4.13)  | 28321 (1.84)   | 0.13 | 0.05 |
| DX | 268         | Once     | 1881 (3.09)  | 30648 (2)      | 0.07 | 0.03 |
| DX | 466         | Once     | 4975 (8.18)  | 74790 (4.87)   | 0.13 | 0.04 |
| DX | 272         | Frequent | 1468 (2.41)  | 17311 (1.13)   | 0.10 | 0.02 |
| DX | 783         | Once     | 2493 (4.1)   | 30019 (1.95)   | 0.13 | 0.04 |
| DX | 782         | Once     | 4297 (7.06)  | 67613 (4.4)    | 0.11 | 0.04 |
| RX | 16252051501 | Once     | 2097 (3.45)  | 32512 (2.12)   | 0.08 | 0.03 |
| DX | 305         | Frequent | 785 (1.29)   | 7241 (0.47)    | 0.09 | 0.04 |
| RX | 53746027205 | Once     | 3736 (6.14)  | 55577 (3.62)   | 0.12 | 0.03 |
| DX | 256         | Sporadic | 1631 (2.68)  | 34203 (2.23)   | 0.03 | 0.03 |
| RX | 00228202796 | Once     | 1016 (1.67)  | 3947 (0.26)    | 0.15 | 0.03 |
| DX | 620         | Frequent | 1439 (2.37)  | 28212 (1.84)   | 0.04 | 0.03 |

NOTE: This table presents the top 60 health variables included in the HDPS model – contact the authors for the full list of 500 variables included

NOTE: Cells with fewer than 15 observations are suppressed to maintain confidentiality

Abbreviations: DX = diagnosis, PR = Procedure, RX = pharmaceutical

\* ICD-9 diagnosis codes Inpatient and Outpatient DX codes, ICD-9 Procedure codes for Inpatient and outpatient PR codes, NDC codes for Outpatient RX codes

\*\*Once – if the code appeared at least once within one year; sporadic – if code appeared at least more than the median; frequent – if the code appeared more than the 75<sup>th</sup> percentile



**eTable 14. Baseline Demographic and Health Characteristics, No Pre-Pregnancy Depression Cohort, Any SSRI**

| Characteristics at the End of Pregnancy                                      |                                  | Had an SSRI Prescription | Did not have an SSRI Prescription | Unweighted Standardized Differences | IPT Weighted Standardized Differences |      |
|------------------------------------------------------------------------------|----------------------------------|--------------------------|-----------------------------------|-------------------------------------|---------------------------------------|------|
|                                                                              |                                  | n (%)                    | n (%)                             |                                     |                                       |      |
| Age                                                                          |                                  |                          |                                   |                                     |                                       |      |
|                                                                              | 15-19                            | 1255 (2.87)              | 74544 (4.8)                       | 0.10                                | 0.02                                  |      |
|                                                                              | 20-24                            | 3815 (8.73)              | 182032 (11.72)                    | 0.10                                | 0.02                                  |      |
|                                                                              | 25-29                            | 10692 (24.47)            | 418901 (26.98)                    | 0.06                                | 0.02                                  |      |
|                                                                              | 30-34                            | 15748 (36.04)            | 524511 (33.78)                    | 0.05                                | 0.01                                  |      |
|                                                                              | 35-39                            | 9460 (21.65)             | 277981 (17.9)                     | 0.09                                | 0.03                                  |      |
|                                                                              | 40-44                            | 2727 (6.24)              | 74791 (4.82)                      | 0.06                                | 0.03                                  |      |
| Year                                                                         |                                  |                          |                                   |                                     |                                       |      |
|                                                                              | 2008 -2011                       | 19913 (45.57)            | 704362 (45.36)                    | 0.00                                | 0.01                                  |      |
|                                                                              | 2012-2015                        | 23784 (54.43)            | 848398 (54.64)                    | 0.00                                | 0.01                                  |      |
| <b>Medical Conditions in the year before a woman's last menstrual period</b> |                                  |                          |                                   |                                     |                                       |      |
|                                                                              | Sexually Transmitted Infection   | 580 (1.33)               | 20618 (1.33)                      | 0.00                                | 0.01                                  |      |
|                                                                              | Assisted Reproductive Technology | 363 (0.83)               | 11865 (0.76)                      | 0.01                                | 0.01                                  |      |
|                                                                              | Pelvic Infection                 | 251 (0.57)               | 7830 (0.5)                        | 0.01                                | 0.02                                  |      |
|                                                                              | Intrauterine Device              | 2055 (4.7)               | 54166 (3.49)                      | 0.06                                | 0.03                                  |      |
|                                                                              | Smoking                          | 1560 (3.57)              | 31097 (2)                         | 0.10                                | 0.04                                  |      |
| <b>Health in the year before a woman's last menstrual period</b>             |                                  |                          |                                   |                                     |                                       |      |
| Data Dimension                                                               | Code*                            | Recurrence**             |                                   |                                     |                                       |      |
| DX                                                                           | 300                              | Once                     | 13779 (31.53)                     | 58733 (3.78)                        | 0.78                                  | 0.06 |
| DX                                                                           | 780                              | Once                     | 11943 (27.33)                     | 219882 (14.16)                      | 0.33                                  | 0.10 |
| DX                                                                           | 625                              | Once                     | 5589 (12.79)                      | 146635 (9.44)                       | 0.11                                  | 0.06 |
| DX                                                                           | 789                              | Once                     | 7513 (17.19)                      | 198719 (12.8)                       | 0.12                                  | 0.06 |
| DX                                                                           | 780                              | Frequent                 | 4567 (10.45)                      | 65784 (4.24)                        | 0.24                                  | 0.08 |
| DX                                                                           | 401                              | Once                     | 2511 (5.75)                       | 49084 (3.16)                        | 0.13                                  | 0.04 |
| DX                                                                           | 786                              | Once                     | 6720 (15.38)                      | 157022 (10.11)                      | 0.16                                  | 0.07 |
| DX                                                                           | 530                              | Once                     | 2569 (5.88)                       | 46544 (3)                           | 0.14                                  | 0.05 |
| DX                                                                           | 305                              | Once                     | 1558 (3.57)                       | 28456 (1.83)                        | 0.11                                  | 0.05 |
| DX                                                                           | 787                              | Once                     | 4886 (11.18)                      | 102686 (6.61)                       | 0.16                                  | 0.06 |
| DX                                                                           | 789                              | Frequent                 | 3421 (7.83)                       | 80477 (5.18)                        | 0.11                                  | 0.06 |
| DX                                                                           | 625                              | Frequent                 | 1941 (4.44)                       | 48434 (3.12)                        | 0.07                                  | 0.04 |
| DX                                                                           | 300                              | Frequent                 | 4842 (11.08)                      | 16057 (1.03)                        | 0.43                                  | 0.03 |
| DX                                                                           | 784                              | Once                     | 5126 (11.73)                      | 111384 (7.17)                       | 0.16                                  | 0.07 |
| DX                                                                           | 401                              | Sporadic                 | 1382 (3.16)                       | 25803 (1.66)                        | 0.10                                  | 0.03 |
| DX                                                                           | 729                              | Once                     | 4588 (10.5)                       | 104193 (6.71)                       | 0.14                                  | 0.06 |
| DX                                                                           | V58                              | Once                     | 2754 (6.3)                        | 46033 (2.96)                        | 0.16                                  | 0.05 |
| DX                                                                           | 346                              | Once                     | 3131 (7.17)                       | 52398 (3.37)                        | 0.17                                  | 0.06 |
| DX                                                                           | 724                              | Once                     | 6132 (14.03)                      | 142062 (9.15)                       | 0.15                                  | 0.07 |
| DX                                                                           | 256                              | Once                     | 2180 (4.99)                       | 63461 (4.09)                        | 0.04                                  | 0.03 |
| DX                                                                           | 786                              | Frequent                 | 2172 (4.97)                       | 42265 (2.72)                        | 0.12                                  | 0.06 |
| DX                                                                           | 626                              | Once                     | 9537 (21.83)                      | 306453 (19.74)                      | 0.05                                  | 0.05 |
| DX                                                                           | 719                              | Once                     | 5147 (11.78)                      | 122807 (7.91)                       | 0.13                                  | 0.05 |
| DX                                                                           | 272                              | Once                     | 2895 (6.63)                       | 62197 (4.01)                        | 0.12                                  | 0.03 |
| DX                                                                           | 309                              | Once                     | 3754 (8.59)                       | 37843 (2.44)                        | 0.27                                  | 0.08 |
| RX                                                                           | 00228202996                      | Once                     | 743 (1.7)                         | 4125 (0.27)                         | 0.15                                  | 0.05 |
| DX                                                                           | 244                              | Once                     | 3661 (8.38)                       | 79273 (5.11)                        | 0.13                                  | 0.04 |
| DX                                                                           | 620                              | Once                     | 2592 (5.93)                       | 78154 (5.03)                        | 0.04                                  | 0.04 |
| DX                                                                           | 530                              | Frequent                 | 952 (2.18)                        | 15223 (0.98)                        | 0.10                                  | 0.04 |
| DX                                                                           | 617                              | Once                     | 891 (2.04)                        | 21390 (1.38)                        | 0.05                                  | 0.02 |
| RX                                                                           | 00093083201                      | Once                     | 1015 (2.32)                       | 3281 (0.21)                         | 0.19                                  | 0.03 |

|    |             |          |               |                |      |      |
|----|-------------|----------|---------------|----------------|------|------|
| DX | 278         | Once     | 1831 (4.19)   | 45934 (2.96)   | 0.07 | 0.02 |
| DX | 296         | Once     | 1862 (4.26)   | 9222 (0.59)    | 0.24 | 0.06 |
| DX | 785         | Once     | 2709 (6.2)    | 53739 (3.46)   | 0.13 | 0.06 |
| DX | 401         | Frequent | 812 (1.86)    | 15047 (0.97)   | 0.08 | 0.03 |
| DX | 784         | Frequent | 1872 (4.28)   | 34043 (2.19)   | 0.12 | 0.05 |
| DX | 346         | Frequent | 1353 (3.1)    | 19703 (1.27)   | 0.13 | 0.05 |
| DX | 724         | Sporadic | 3406 (7.79)   | 74889 (4.82)   | 0.12 | 0.06 |
| RX | 00093007401 | Once     | 1156 (2.65)   | 8311 (0.54)    | 0.17 | 0.04 |
| RX | 00093007401 | Frequent | 493 (1.13)    | 2545 (0.16)    | 0.12 | 0.03 |
| RX | 00228202796 | Once     | 774 (1.77)    | 4189 (0.27)    | 0.15 | 0.04 |
| DX | 723         | Once     | 3741 (8.56)   | 78498 (5.06)   | 0.14 | 0.06 |
| DX | 218         | Once     | 589 (1.35)    | 28313 (1.82)   | 0.04 | 0.01 |
| DX | 256         | Sporadic | 1178 (2.7)    | 34656 (2.23)   | 0.03 | 0.03 |
| RX | 00378034505 | Once     | 607 (1.39)    | 8945 (0.58)    | 0.08 | 0.03 |
| RX | 65162062711 | Once     | 560 (1.28)    | 9247 (0.6)     | 0.07 | 0.03 |
| DX | V72         | Once     | 26333 (60.26) | 842525 (54.26) | 0.12 | 0.05 |
| DX | 466         | Once     | 3501 (8.01)   | 76264 (4.91)   | 0.13 | 0.04 |
| DX | 272         | Frequent | 1012 (2.32)   | 17767 (1.14)   | 0.09 | 0.02 |
| DX | 787         | Frequent | 1670 (3.82)   | 29161 (1.88)   | 0.12 | 0.05 |
| DX | V58         | Frequent | 819 (1.87)    | 13435 (0.87)   | 0.09 | 0.04 |
| RX | 00406051201 | Once     | 1507 (3.45)   | 33372 (2.15)   | 0.08 | 0.02 |
| DX | 783         | Once     | 1667 (3.81)   | 30845 (1.99)   | 0.11 | 0.04 |
| DX | 493         | Once     | 2599 (5.95)   | 58928 (3.8)    | 0.10 | 0.04 |
| DX | 788         | Once     | 3223 (7.38)   | 82284 (5.3)    | 0.09 | 0.05 |
| DX | 626         | Frequent | 4029 (9.22)   | 130075 (8.38)  | 0.03 | 0.04 |
| RX | 53746027205 | Once     | 2540 (5.81)   | 56773 (3.66)   | 0.10 | 0.03 |
| DX | 790         | Once     | 1605 (3.67)   | 36450 (2.35)   | 0.08 | 0.03 |
| DX | 268         | Once     | 1263 (2.89)   | 31266 (2.01)   | 0.06 | 0.03 |
| DX | 729         | Frequent | 1717 (3.93)   | 36127 (2.33)   | 0.09 | 0.05 |

NOTE: This table presents the top 60 health variables included in the HDPS model – contact the authors for the full list of 500 variables included

NOTE: Cells with fewer than 15 observations are suppressed to maintain confidentiality

Abbreviations: DX = diagnosis, PR = Procedure, RX = pharmaceutical

\* ICD-9 diagnosis codes Inpatient and Outpatient DX codes, ICD-9 Procedure codes for Inpatient and outpatient PR codes, NDC codes for Outpatient RX codes

\*\*Once – if the code appeared at least once within one year; sporadic – if code appeared at least more than the median; frequent – if the code appeared more than the 75<sup>th</sup> percentile

**eTable 15. Baseline Demographic and Health Characteristics, No Pre-Pregnancy Depression Cohort, Any SNRI**

| Characteristics at the End of Pregnancy                                      |                                  | Had an SNRI Prescription | Did not have an SNRI Prescription | Unweighted Standardized Differences | IPT Weighted Standardized Differences |      |
|------------------------------------------------------------------------------|----------------------------------|--------------------------|-----------------------------------|-------------------------------------|---------------------------------------|------|
|                                                                              |                                  | n (%)                    | n (%)                             |                                     |                                       |      |
| Age                                                                          |                                  |                          |                                   |                                     |                                       |      |
|                                                                              | 15-19                            | 139 (1.97)               | 75660 (4.76)                      | 0.15                                | 0.05                                  |      |
|                                                                              | 20-24                            | 581 (8.25)               | 185266 (11.66)                    | 0.11                                | 0.00                                  |      |
|                                                                              | 25-29                            | 1619 (22.98)             | 427974 (26.93)                    | 0.09                                | 0.00                                  |      |
|                                                                              | 30-34                            | 2397 (34.03)             | 537862 (33.84)                    | 0.00                                | 0.01                                  |      |
|                                                                              | 35-39                            | 1756 (24.93)             | 285685 (17.97)                    | 0.17                                | 0.03                                  |      |
|                                                                              | 40-44                            | 552 (7.84)               | 76966 (4.84)                      | 0.12                                | 0.02                                  |      |
| Year                                                                         |                                  |                          |                                   |                                     |                                       |      |
|                                                                              | 2008 -2011                       | 3530 (50.11)             | 720745 (45.35)                    | 0.10                                | 0.01                                  |      |
|                                                                              | 2012-2015                        | 3514 (49.89)             | 868668 (54.65)                    | 0.10                                | 0.01                                  |      |
| <b>Medical Conditions in the year before a woman's last menstrual period</b> |                                  |                          |                                   |                                     |                                       |      |
|                                                                              | Sexually Transmitted Infection   | 100 (1.42)               | 21098 (1.33)                      | 0.01                                | 0.00                                  |      |
|                                                                              | Assisted Reproductive Technology | 36 (0.51)                | 12192 (0.77)                      | 0.03                                | 0.02                                  |      |
|                                                                              | Pelvic Infection                 | 42 (0.6)                 | 8039 (0.51)                       | 0.01                                | 0.03                                  |      |
|                                                                              | Intrauterine Device              | 338 (4.8)                | 55883 (3.52)                      | 0.06                                | 0.03                                  |      |
|                                                                              | Smoking                          | 340 (4.83)               | 32317 (2.03)                      | 0.15                                | 0.08                                  |      |
| <b>Health in the year before a woman's last menstrual period</b>             |                                  |                          |                                   |                                     |                                       |      |
| Data Dimension                                                               | Code*                            | Recurrence**             |                                   |                                     |                                       |      |
| DX                                                                           | 300                              | Once                     | 2000 (28.39)                      | 70512 (4.44)                        | 0.68                                  | 0.14 |
| DX                                                                           | 780                              | Once                     | 2399 (34.06)                      | 229426 (14.43)                      | 0.47                                  | 0.12 |
| DX                                                                           | 401                              | Once                     | 605 (8.59)                        | 50990 (3.21)                        | 0.23                                  | 0.07 |
| DX                                                                           | 729                              | Once                     | 1197 (16.99)                      | 107584 (6.77)                       | 0.32                                  | 0.09 |
| DX                                                                           | 780                              | Frequent                 | 1020 (14.48)                      | 69331 (4.36)                        | 0.35                                  | 0.11 |
| DX                                                                           | 789                              | Once                     | 1364 (19.36)                      | 204868 (12.89)                      | 0.18                                  | 0.09 |
| DX                                                                           | 401                              | Sporadic                 | 352 (5)                           | 26833 (1.69)                        | 0.18                                  | 0.07 |
| DX                                                                           | 625                              | Once                     | 919 (13.05)                       | 151305 (9.52)                       | 0.11                                  | 0.08 |
| DX                                                                           | 305                              | Once                     | 341 (4.84)                        | 29673 (1.87)                        | 0.17                                  | 0.07 |
| DX                                                                           | 628                              | Once                     | 445 (6.32)                        | 127406 (8.02)                       | 0.07                                  | 0.02 |
| DX                                                                           | 346                              | Once                     | 761 (10.8)                        | 54768 (3.45)                        | 0.29                                  | 0.09 |
| DX                                                                           | 786                              | Once                     | 1184 (16.81)                      | 162558 (10.23)                      | 0.19                                  | 0.11 |
| DX                                                                           | 789                              | Frequent                 | 677 (9.61)                        | 83221 (5.24)                        | 0.17                                  | 0.09 |
| DX                                                                           | 784                              | Once                     | 1051 (14.92)                      | 115459 (7.26)                       | 0.25                                  | 0.08 |
| DX                                                                           | 724                              | Once                     | 1313 (18.64)                      | 146881 (9.24)                       | 0.27                                  | 0.09 |
| DX                                                                           | 719                              | Once                     | 1126 (15.99)                      | 126828 (7.98)                       | 0.25                                  | 0.08 |
| DX                                                                           | 530                              | Once                     | 500 (7.1)                         | 48613 (3.06)                        | 0.18                                  | 0.08 |
| DX                                                                           | V58                              | Once                     | 607 (8.62)                        | 48180 (3.03)                        | 0.24                                  | 0.06 |
| DX                                                                           | 729                              | Frequent                 | 594 (8.43)                        | 37250 (2.34)                        | 0.27                                  | 0.08 |
| DX                                                                           | 633                              | Once                     | 35 (0.5)                          | 13317 (0.84)                        | 0.04                                  | 0.06 |
| DX                                                                           | 787                              | Once                     | 924 (13.12)                       | 106648 (6.71)                       | 0.22                                  | 0.09 |
| RX                                                                           | 65162062711                      | Once                     | 187 (2.65)                        | 9620 (0.61)                         | 0.16                                  | 0.06 |
| DX                                                                           | V26                              | Once                     | 325 (4.61)                        | 104587 (6.58)                       | 0.09                                  | 0.00 |
| DX                                                                           | 625                              | Frequent                 | 350 (4.97)                        | 50025 (3.15)                        | 0.09                                  | 0.07 |
| DX                                                                           | 278                              | Once                     | 387 (5.49)                        | 47378 (2.98)                        | 0.13                                  | 0.04 |
| DX                                                                           | 346                              | Frequent                 | 388 (5.51)                        | 20668 (1.3)                         | 0.23                                  | 0.07 |
| DX                                                                           | 272                              | Once                     | 579 (8.22)                        | 64513 (4.06)                        | 0.17                                  | 0.05 |
| DX                                                                           | 628                              | Sporadic                 | 231 (3.28)                        | 70533 (4.44)                        | 0.06                                  | 0.01 |
| DX                                                                           | 786                              | Frequent                 | 432 (6.13)                        | 44005 (2.77)                        | 0.16                                  | 0.07 |
| DX                                                                           | 401                              | Frequent                 | 200 (2.84)                        | 15659 (0.99)                        | 0.14                                  | 0.06 |
| DX                                                                           | 724                              | Sporadic                 | 763 (10.83)                       | 77532 (4.88)                        | 0.22                                  | 0.09 |

|    |             |          |             |               |      |      |
|----|-------------|----------|-------------|---------------|------|------|
| DX | 722         | Once     | 415 (5.89)  | 28661 (1.8)   | 0.21 | 0.07 |
| DX | 296         | Once     | 460 (6.53)  | 10624 (0.67)  | 0.32 | 0.10 |
| DX | 633         | Sporadic | 23 (0.33)   | 8191 (0.52)   | 0.03 | 0.05 |
| DX | 784         | Frequent | 412 (5.85)  | 35503 (2.23)  | 0.18 | 0.09 |
| DX | 530         | Frequent | 190 (2.7)   | 15985 (1.01)  | 0.13 | 0.05 |
| DX | 256         | Once     | 361 (5.12)  | 65280 (4.11)  | 0.05 | 0.05 |
| DX | 300         | Frequent | 754 (10.7)  | 20145 (1.27)  | 0.41 | 0.09 |
| DX | 244         | Once     | 672 (9.54)  | 82262 (5.18)  | 0.17 | 0.05 |
| DX | 723         | Once     | 811 (11.51) | 81428 (5.12)  | 0.23 | 0.07 |
| DX | V58         | Frequent | 208 (2.95)  | 14046 (0.88)  | 0.15 | 0.04 |
| RX | 00093083201 | Once     | 219 (3.11)  | 4077 (0.26)   | 0.22 | 0.07 |
| RX | 00093007401 | Frequent | 117 (1.66)  | 2921 (0.18)   | 0.15 | 0.07 |
| DX | 628         | Frequent | 95 (1.35)   | 32938 (2.07)  | 0.06 | 0.01 |
| DX | 617         | Once     | 154 (2.19)  | 22127 (1.39)  | 0.06 | 0.02 |
| RX | 00378034505 | Once     | 134 (1.9)   | 9418 (0.59)   | 0.12 | 0.05 |
| DX | 309         | Once     | 624 (8.86)  | 40973 (2.58)  | 0.27 | 0.08 |
| DX | 338         | Once     | 241 (3.42)  | 18826 (1.18)  | 0.15 | 0.05 |
| RX | 00093007401 | Once     | 257 (3.65)  | 9210 (0.58)   | 0.21 | 0.09 |
| RX | 00228202996 | Once     | 134 (1.9)   | 4734 (0.3)    | 0.15 | 0.07 |
| DX | 272         | Frequent | 223 (3.17)  | 18556 (1.17)  | 0.14 | 0.04 |
| DX | 640         | Once     | 309 (4.39)  | 107329 (6.75) | 0.10 | 0.03 |
| DX | 268         | Once     | 255 (3.62)  | 32274 (2.03)  | 0.10 | 0.03 |
| DX | 466         | Once     | 690 (9.8)   | 79075 (4.98)  | 0.19 | 0.07 |
| DX | V26         | Frequent | 81 (1.15)   | 28685 (1.8)   | 0.05 | 0.02 |
| DX | 785         | Once     | 471 (6.69)  | 55977 (3.52)  | 0.14 | 0.07 |
| DX | 782         | Once     | 577 (8.19)  | 71333 (4.49)  | 0.15 | 0.04 |
| RX | 00781183001 | Once     | 305 (4.33)  | 23430 (1.47)  | 0.17 | 0.06 |
| RX | 59746000103 | Once     | 369 (5.24)  | 31198 (1.96)  | 0.18 | 0.07 |
| DX | V27         | Once     | 166 (2.36)  | 68427 (4.31)  | 0.11 | 0.03 |

NOTE: This table presents the top 60 health variables included in the HDPS model – contact the authors for the full list of 500 variables included

NOTE: Cells with fewer than 15 observations are suppressed to maintain confidentiality

Abbreviations: DX = diagnosis, PR = Procedure, RX = pharmaceutical

\* ICD-9 diagnosis codes Inpatient and Outpatient DX codes, ICD-9 Procedure codes for Inpatient and outpatient PR codes, NDC codes for Outpatient RX codes

\*\*Once – if the code appeared at least once within one year; sporadic – if code appeared at least more than the median; frequent – if the code appeared more than the 75<sup>th</sup> percentile

**eTable 16. Baseline Demographic and Health Characteristics, No Pre-Pregnancy Depression Cohort, Any TCA**

| Characteristics at the End of Pregnancy                                      |                                  |              | Had a TCA Prescription | Did not have a TCA Prescription | Unweighted Standardized Differences | IPT Weighted Standardized Differences |
|------------------------------------------------------------------------------|----------------------------------|--------------|------------------------|---------------------------------|-------------------------------------|---------------------------------------|
|                                                                              |                                  |              | n (%)                  | n (%)                           |                                     |                                       |
| <b>Age</b>                                                                   |                                  |              |                        |                                 |                                     |                                       |
|                                                                              | 15-19                            |              | 174 (4.71)             | 75625 (4.75)                    | 0.00                                | 0.05                                  |
|                                                                              | 20-24                            |              | 477 (12.9)             | 185370 (11.64)                  | 0.04                                | 0.01                                  |
|                                                                              | 25-29                            |              | 980 (26.5)             | 428613 (26.91)                  | 0.01                                | 0.01                                  |
|                                                                              | 30-34                            |              | 1162 (31.42)           | 539097 (33.85)                  | 0.05                                | 0.03                                  |
|                                                                              | 35-39                            |              | 677 (18.31)            | 286764 (18)                     | 0.01                                | 0.01                                  |
|                                                                              | 40-44                            |              | 228 (6.17)             | 77290 (4.85)                    | 0.06                                | 0.05                                  |
| <b>Year</b>                                                                  |                                  |              |                        |                                 |                                     |                                       |
|                                                                              | 2008 -2011                       |              | 1610 (43.54)           | 722665 (45.37)                  | 0.04                                | 0.02                                  |
|                                                                              | 2012-2015                        |              | 2088 (56.46)           | 870094 (54.63)                  | 0.04                                | 0.02                                  |
| <b>Medical Conditions in the year before a woman's last menstrual period</b> |                                  |              |                        |                                 |                                     |                                       |
|                                                                              | Sexually Transmitted Infection   |              | 61 (1.65)              | 21137 (1.33)                    | 0.03                                | 0.03                                  |
|                                                                              | Assisted Reproductive Technology |              | Suppressed             | 12219 (0.77)                    | -                                   | -                                     |
|                                                                              | Pelvic Infection                 |              | 28 (0.76)              | 8053 (0.51)                     | 0.03                                | 0.01                                  |
|                                                                              | Intrauterine Device              |              | 162 (4.38)             | 56059 (3.52)                    | 0.04                                | 0.03                                  |
|                                                                              | Smoking                          |              | 187 (5.06)             | 32470 (2.04)                    | 0.16                                | 0.05                                  |
| <b>Health in the year before a woman's last menstrual period</b>             |                                  |              |                        |                                 |                                     |                                       |
| Data Dimension                                                               | Code*                            | Recurrence** |                        |                                 |                                     |                                       |
| DX                                                                           | 346                              | Once         | 1376 (37.21)           | 54153 (3.4)                     | 0.93                                | 0.12                                  |
| DX                                                                           | 346                              | Frequent     | 861 (23.28)            | 20195 (1.27)                    | 0.71                                | 0.09                                  |
| DX                                                                           | 784                              | Once         | 1233 (33.34)           | 115277 (7.24)                   | 0.69                                | 0.18                                  |
| DX                                                                           | 789                              | Once         | 1031 (27.88)           | 205201 (12.88)                  | 0.38                                | 0.17                                  |
| DX                                                                           | 625                              | Once         | 665 (17.98)            | 151559 (9.52)                   | 0.25                                | 0.14                                  |
| DX                                                                           | 784                              | Frequent     | 669 (18.09)            | 35246 (2.21)                    | 0.54                                | 0.15                                  |
| DX                                                                           | 789                              | Frequent     | 575 (15.55)            | 83323 (5.23)                    | 0.34                                | 0.16                                  |
| DX                                                                           | 625                              | Frequent     | 294 (7.95)             | 50081 (3.14)                    | 0.21                                | 0.13                                  |
| DX                                                                           | 780                              | Once         | 1223 (33.07)           | 230602 (14.48)                  | 0.45                                | 0.18                                  |
| DX                                                                           | 729                              | Once         | 681 (18.42)            | 108100 (6.79)                   | 0.36                                | 0.20                                  |
| DX                                                                           | 787                              | Once         | 718 (19.42)            | 106854 (6.71)                   | 0.38                                | 0.22                                  |
| DX                                                                           | 530                              | Once         | 359 (9.71)             | 48754 (3.06)                    | 0.27                                | 0.15                                  |
| DX                                                                           | 628                              | Once         | 206 (5.57)             | 127645 (8.01)                   | 0.10                                | 0.04                                  |
| DX                                                                           | 780                              | Frequent     | 517 (13.98)            | 69834 (4.38)                    | 0.34                                | 0.16                                  |
| DX                                                                           | 786                              | Once         | 701 (18.96)            | 163041 (10.24)                  | 0.25                                | 0.17                                  |
| RX                                                                           | 65162062711                      | Once         | 142 (3.84)             | 9665 (0.61)                     | 0.22                                | 0.08                                  |
| DX                                                                           | 401                              | Once         | 266 (7.19)             | 51329 (3.22)                    | 0.18                                | 0.08                                  |
| DX                                                                           | 724                              | Once         | 800 (21.63)            | 147394 (9.25)                   | 0.35                                | 0.16                                  |
| DX                                                                           | 300                              | Once         | 519 (14.03)            | 71993 (4.52)                    | 0.33                                | 0.20                                  |
| DX                                                                           | 719                              | Once         | 646 (17.47)            | 127308 (7.99)                   | 0.29                                | 0.13                                  |
| DX                                                                           | V58                              | Once         | 347 (9.38)             | 48440 (3.04)                    | 0.27                                | 0.11                                  |
| DX                                                                           | 305                              | Once         | 177 (4.79)             | 29837 (1.87)                    | 0.16                                | 0.06                                  |
| DX                                                                           | 729                              | Frequent     | 325 (8.79)             | 37519 (2.36)                    | 0.28                                | 0.15                                  |
| DX                                                                           | 628                              | Sporadic     | 107 (2.89)             | 70657 (4.44)                    | 0.08                                | 0.04                                  |
| DX                                                                           | 786                              | Frequent     | 268 (7.25)             | 44169 (2.77)                    | 0.21                                | 0.11                                  |
| DX                                                                           | 620                              | Once         | 263 (7.11)             | 80483 (5.05)                    | 0.09                                | 0.02                                  |
| RX                                                                           | 00603254428                      | Once         | 116 (3.14)             | 4169 (0.26)                     | 0.22                                | 0.07                                  |
| DX                                                                           | 787                              | Frequent     | 315 (8.52)             | 30516 (1.92)                    | 0.30                                | 0.22                                  |
| DX                                                                           | 788                              | Once         | 476 (12.87)            | 85031 (5.34)                    | 0.26                                | 0.09                                  |
| DX                                                                           | 723                              | Once         | 579 (15.66)            | 81660 (5.13)                    | 0.35                                | 0.10                                  |
| RX                                                                           | 00603254421                      | Once         | 120 (3.24)             | 3671 (0.23)                     | 0.23                                | 0.06                                  |

|    |             |          |             |                |      |      |
|----|-------------|----------|-------------|----------------|------|------|
| DX | 620         | Frequent | 128 (3.46)  | 29523 (1.85)   | 0.10 | 0.02 |
| DX | 724         | Sporadic | 468 (12.66) | 77827 (4.89)   | 0.28 | 0.11 |
| DX | 599         | Once     | 676 (18.28) | 169539 (10.64) | 0.22 | 0.09 |
| DX | 530         | Frequent | 126 (3.41)  | 16049 (1.01)   | 0.16 | 0.14 |
| DX | 278         | Once     | 202 (5.46)  | 47563 (2.99)   | 0.12 | 0.05 |
| RX | 00603254428 | Frequent | 46 (1.24)   | 1037 (0.07)    | 0.15 | 0.04 |
| DX | 338         | Once     | 180 (4.87)  | 18887 (1.19)   | 0.22 | 0.10 |
| DX | 401         | Sporadic | 137 (3.7)   | 27048 (1.7)    | 0.12 | 0.10 |
| DX | 633         | Frequent | Suppressed  | 3947 (0.25)    | -    | -    |
| RX | 00781183001 | Once     | 250 (6.76)  | 23485 (1.47)   | 0.27 | 0.06 |
| DX | 617         | Once     | 97 (2.62)   | 22184 (1.39)   | 0.09 | 0.01 |
| DX | 722         | Once     | 244 (6.6)   | 28832 (1.81)   | 0.24 | 0.11 |
| DX | 782         | Once     | 409 (11.06) | 71501 (4.49)   | 0.25 | 0.12 |
| DX | 633         | Once     | 21 (0.57)   | 13331 (0.84)   | 0.03 | 0.01 |
| DX | 616         | Once     | 445 (12.03) | 138536 (8.7)   | 0.11 | 0.08 |
| DX | V26         | Once     | 184 (4.98)  | 104728 (6.58)  | 0.07 | 0.06 |
| RX | 00406051201 | Once     | 198 (5.35)  | 34681 (2.18)   | 0.17 | 0.04 |
| DX | 628         | Frequent | 42 (1.14)   | 32991 (2.07)   | 0.07 | 0.03 |
| RX | 00378034505 | Once     | 85 (2.3)    | 9467 (0.59)    | 0.14 | 0.04 |
| DX | 535         | Once     | 177 (4.79)  | 23318 (1.46)   | 0.19 | 0.10 |
| DX | 614         | Once     | 54 (1.46)   | 15428 (0.97)   | 0.04 | 0.01 |
| DX | 268         | Once     | 153 (4.14)  | 32376 (2.03)   | 0.12 | 0.07 |
| DX | 564         | Once     | 390 (10.55) | 37338 (2.34)   | 0.34 | 0.15 |
| PR | 5940        | Once     | 76 (2.06)   | 71521 (4.49)   | 0.14 | 0.00 |
| RX | 16252051501 | Once     | 174 (4.71)  | 34435 (2.16)   | 0.14 | 0.05 |
| RX | 59746017710 | Once     | 119 (3.22)  | 12317 (0.77)   | 0.18 | 0.09 |
| DX | V58         | Frequent | 113 (3.06)  | 14141 (0.89)   | 0.16 | 0.10 |
| DX | 272         | Once     | 262 (7.08)  | 64830 (4.07)   | 0.13 | 0.09 |
| DX | 650         | Once     | 82 (2.22)   | 71900 (4.51)   | 0.13 | 0.02 |

NOTE: This table presents the top 60 health variables included in the HDPS model – contact the authors for the full list of 500 variables included

NOTE: Cells with fewer than 15 observations are suppressed to maintain confidentiality

Abbreviations: DX = diagnosis, PR = Procedure, RX = pharmaceutical

\* ICD-9 diagnosis codes Inpatient and Outpatient DX codes, ICD-9 Procedure codes for Inpatient and outpatient PR codes, NDC codes for Outpatient RX codes

\*\*Once – if the code appeared at least once within one year; sporadic – if code appeared at least more than the median; frequent – if the code appeared more than the 75<sup>th</sup> percentile

**eTable 17. Baseline Demographic and Health Characteristics, No Pre-Pregnancy Depression Cohort, Any ‘Other’ Antidepressant**

| Characteristics at the End of Pregnancy                                      | Had an ‘Other’ Antidepressant Prescription | Did not have an ‘Other’ Antidepressant Prescription | Unweighted Standardized Differences | IPT Weighted Standardized Differences |      |      |
|------------------------------------------------------------------------------|--------------------------------------------|-----------------------------------------------------|-------------------------------------|---------------------------------------|------|------|
|                                                                              | n (%)                                      | n (%)                                               |                                     |                                       |      |      |
| <b>Age</b>                                                                   |                                            |                                                     |                                     |                                       |      |      |
| 15-19                                                                        | 256 (2.62)                                 | 75543 (4.76)                                        | 0.11                                | 0.01                                  |      |      |
| 20-24                                                                        | 797 (8.16)                                 | 185050 (11.66)                                      | 0.12                                | 0.02                                  |      |      |
| 25-29                                                                        | 2136 (21.87)                               | 427457 (26.94)                                      | 0.12                                | 0.01                                  |      |      |
| 30-34                                                                        | 3303 (33.82)                               | 536956 (33.84)                                      | 0.00                                | 0.00                                  |      |      |
| 35-39                                                                        | 2431 (24.89)                               | 285010 (17.96)                                      | 0.17                                | 0.02                                  |      |      |
| 40-44                                                                        | 844 (8.64)                                 | 76674 (4.83)                                        | 0.15                                | 0.01                                  |      |      |
| <b>Year</b>                                                                  |                                            |                                                     |                                     |                                       |      |      |
| 2008 -2011                                                                   | 4510 (46.18)                               | 719765 (45.36)                                      | 0.02                                | 0.00                                  |      |      |
| 2012-2015                                                                    | 5257 (53.82)                               | 866925 (54.64)                                      | 0.02                                | 0.00                                  |      |      |
| <b>Medical Conditions in the year before a woman’s last menstrual period</b> |                                            |                                                     |                                     |                                       |      |      |
| Sexually Transmitted Infection                                               | 143 (1.46)                                 | 21055 (1.33)                                        | 0.01                                | 0.00                                  |      |      |
| Assisted Reproductive Technology                                             | 62 (0.63)                                  | 12166 (0.77)                                        | 0.02                                | 0.03                                  |      |      |
| Pelvic Infection                                                             | 58 (0.59)                                  | 8023 (0.51)                                         | 0.01                                | 0.02                                  |      |      |
| Intrauterine Device                                                          | 537 (5.5)                                  | 55684 (3.51)                                        | 0.10                                | 0.03                                  |      |      |
| Smoking                                                                      | 588 (6.02)                                 | 32069 (2.02)                                        | 0.20                                | 0.07                                  |      |      |
| <b>Health in the year before a woman’s last menstrual period</b>             |                                            |                                                     |                                     |                                       |      |      |
| Data Dimension                                                               | Code*                                      | Recurrence**                                        |                                     |                                       |      |      |
| DX                                                                           | 300                                        | Once                                                | 2170 (22.22)                        | 70342 (4.43)                          | 0.54 | 0.13 |
| DX                                                                           | 780                                        | Once                                                | 3085 (31.59)                        | 228740 (14.42)                        | 0.42 | 0.10 |
| DX                                                                           | 305                                        | Once                                                | 622 (6.37)                          | 29392 (1.85)                          | 0.23 | 0.08 |
| DX                                                                           | 625                                        | Once                                                | 1305 (13.36)                        | 150919 (9.51)                         | 0.12 | 0.06 |
| DX                                                                           | 780                                        | Frequent                                            | 1253 (12.83)                        | 69098 (4.35)                          | 0.31 | 0.09 |
| DX                                                                           | 401                                        | Once                                                | 672 (6.88)                          | 50923 (3.21)                          | 0.17 | 0.04 |
| DX                                                                           | 789                                        | Once                                                | 1786 (18.29)                        | 204446 (12.89)                        | 0.15 | 0.07 |
| DX                                                                           | 296                                        | Once                                                | 907 (9.29)                          | 10177 (0.64)                          | 0.41 | 0.07 |
| DX                                                                           | 786                                        | Once                                                | 1536 (15.73)                        | 162206 (10.22)                        | 0.16 | 0.07 |
| DX                                                                           | 789                                        | Frequent                                            | 872 (8.93)                          | 83026 (5.23)                          | 0.14 | 0.06 |
| DX                                                                           | 401                                        | Sporadic                                            | 380 (3.89)                          | 26805 (1.69)                          | 0.13 | 0.04 |
| DX                                                                           | 729                                        | Once                                                | 1205 (12.34)                        | 107576 (6.78)                         | 0.19 | 0.06 |
| DX                                                                           | V58                                        | Once                                                | 756 (7.74)                          | 48031 (3.03)                          | 0.21 | 0.07 |
| DX                                                                           | 530                                        | Once                                                | 630 (6.45)                          | 48483 (3.06)                          | 0.16 | 0.05 |
| DX                                                                           | 625                                        | Frequent                                            | 468 (4.79)                          | 49907 (3.15)                          | 0.08 | 0.06 |
| DX                                                                           | 724                                        | Once                                                | 1604 (16.42)                        | 146590 (9.24)                         | 0.22 | 0.09 |
| DX                                                                           | 719                                        | Once                                                | 1353 (13.85)                        | 126601 (7.98)                         | 0.19 | 0.06 |
| DX                                                                           | 278                                        | Once                                                | 508 (5.2)                           | 47257 (2.98)                          | 0.11 | 0.03 |
| DX                                                                           | 787                                        | Once                                                | 1149 (11.76)                        | 106423 (6.71)                         | 0.18 | 0.07 |
| DX                                                                           | 346                                        | Once                                                | 805 (8.24)                          | 54724 (3.45)                          | 0.21 | 0.07 |
| DX                                                                           | 620                                        | Once                                                | 637 (6.52)                          | 80109 (5.05)                          | 0.06 | 0.06 |
| DX                                                                           | 784                                        | Once                                                | 1211 (12.4)                         | 115299 (7.27)                         | 0.17 | 0.07 |
| DX                                                                           | 256                                        | Once                                                | 512 (5.24)                          | 65129 (4.1)                           | 0.05 | 0.05 |
| DX                                                                           | 305                                        | Frequent                                            | 220 (2.25)                          | 7806 (0.49)                           | 0.15 | 0.06 |
| RX                                                                           | 65162062711                                | Once                                                | 188 (1.92)                          | 9619 (0.61)                           | 0.12 | 0.05 |
| DX                                                                           | 272                                        | Once                                                | 692 (7.09)                          | 64400 (4.06)                          | 0.13 | 0.04 |
| DX                                                                           | 786                                        | Frequent                                            | 513 (5.25)                          | 43924 (2.77)                          | 0.13 | 0.07 |
| DX                                                                           | 617                                        | Once                                                | 223 (2.28)                          | 22058 (1.39)                          | 0.07 | 0.03 |
| DX                                                                           | 309                                        | Once                                                | 921 (9.43)                          | 40676 (2.56)                          | 0.29 | 0.09 |
| DX                                                                           | 244                                        | Once                                                | 894 (9.15)                          | 82040 (5.17)                          | 0.15 | 0.02 |

|    |             |          |              |                |      |      |
|----|-------------|----------|--------------|----------------|------|------|
| DX | 401         | Frequent | 222 (2.27)   | 15637 (0.99)   | 0.10 | 0.04 |
| DX | 626         | Once     | 2143 (21.94) | 313847 (19.78) | 0.05 | 0.06 |
| DX | 724         | Sporadic | 918 (9.4)    | 77377 (4.88)   | 0.18 | 0.07 |
| RX | 00093007401 | Frequent | 161 (1.65)   | 2877 (0.18)    | 0.15 | 0.04 |
| DX | 296         | Sporadic | 718 (7.35)   | 6434 (0.41)    | 0.37 | 0.06 |
| RX | 00093007401 | Once     | 367 (3.76)   | 9100 (0.57)    | 0.22 | 0.05 |
| DX | 268         | Once     | 364 (3.73)   | 32165 (2.03)   | 0.10 | 0.03 |
| RX | 00228202996 | Once     | 190 (1.95)   | 4678 (0.29)    | 0.16 | 0.05 |
| DX | V58         | Frequent | 261 (2.67)   | 13993 (0.88)   | 0.14 | 0.05 |
| DX | 599         | Once     | 1428 (14.62) | 168787 (10.64) | 0.12 | 0.05 |
| DX | 723         | Once     | 996 (10.2)   | 81243 (5.12)   | 0.19 | 0.07 |
| RX | 16252051501 | Once     | 402 (4.12)   | 34207 (2.16)   | 0.11 | 0.04 |
| DX | 300         | Frequent | 836 (8.56)   | 20063 (1.26)   | 0.34 | 0.09 |
| DX | 346         | Frequent | 358 (3.67)   | 20698 (1.3)    | 0.15 | 0.05 |
| DX | 722         | Once     | 446 (4.57)   | 28630 (1.8)    | 0.16 | 0.04 |
| DX | 729         | Frequent | 495 (5.07)   | 37349 (2.35)   | 0.14 | 0.04 |
| DX | 783         | Once     | 489 (5.01)   | 32023 (2.02)   | 0.16 | 0.06 |
| DX | 256         | Sporadic | 282 (2.89)   | 35552 (2.24)   | 0.04 | 0.04 |
| RX | 00093083201 | Once     | 237 (2.43)   | 4059 (0.26)    | 0.19 | 0.05 |
| DX | 620         | Frequent | 253 (2.59)   | 29398 (1.85)   | 0.05 | 0.06 |
| DX | 788         | Once     | 836 (8.56)   | 84671 (5.34)   | 0.13 | 0.06 |
| RX | 00378034505 | Once     | 163 (1.67)   | 9389 (0.59)    | 0.10 | 0.04 |
| DX | 314         | Once     | 581 (5.95)   | 16802 (1.06)   | 0.27 | 0.07 |
| PR | 5940        | Once     | 287 (2.94)   | 71310 (4.49)   | 0.08 | 0.03 |
| DX | 530         | Frequent | 199 (2.04)   | 15976 (1.01)   | 0.08 | 0.04 |
| DX | 784         | Frequent | 428 (4.38)   | 35487 (2.24)   | 0.12 | 0.07 |
| DX | 278         | Frequent | 202 (2.07)   | 16672 (1.05)   | 0.08 | 0.01 |
| RX | 53746027205 | Once     | 653 (6.69)   | 58660 (3.7)    | 0.14 | 0.04 |
| RX | 00781183001 | Once     | 378 (3.87)   | 23357 (1.47)   | 0.15 | 0.05 |
| RX | 00406051201 | Once     | 379 (3.88)   | 34500 (2.17)   | 0.10 | 0.03 |

NOTE: This table presents the top 60 health variables included in the HDPS model – contact the authors for the full list of 500 variables included

NOTE: Cells with fewer than 15 observations are suppressed to maintain confidentiality

Abbreviations: DX = diagnosis, PR = Procedure, RX = pharmaceutical

\* ICD-9 diagnosis codes Inpatient and Outpatient DX codes, ICD-9 Procedure codes for Inpatient and outpatient PR codes, NDC codes for Outpatient RX codes

\*\*Once – if the code appeared at least once within one year; sporadic – if code appeared at least more than the median; frequent – if the code appeared more than the 75<sup>th</sup> percentile
